# Supplementary material for: Enantioselective hydrogenation of cyclic imines catalysed by Noyori–Ikariya half-sandwich complexes and their analogues
Source: Royal Society of Chemistry journal article supplement (doi:10.1039/c5cc06712j), 2015-10-19
Supplement: c5cc06712j1.pdf [file c5cc06712j1.pdf]

# Enantioselective Hydrogenation of Cyclic Imines Catalysed by Noyori-Ikariya Half-Sandwich Complexes and Their Analogues

B. Vilhanová,<sup>a</sup> J. Václavík,<sup>bc</sup> P. Šot,<sup>a</sup> J. Pecháček,<sup>a</sup> J. Zápál,<sup>c</sup> R. Pažout,<sup>d</sup> J. Maixner,<sup>d</sup> M. Kuzma<sup>c</sup> and P. Kačera<sup>a</sup>

<sup>a</sup> Department of Organic Technology, University of Chemistry and Technology, Technická 5, CZ-166 28 Prague, Czech Republic.

<sup>b</sup> Institute of Organic Chemistry and Biochemistry, v.v.i., Academy of Sciences of the Czech Republic, Flemingovo nám. 2, CZ-166 10 Prague, Czech Republic.

<sup>c</sup> Laboratory of Molecular Structure Characterization, Institute of Microbiology, v.v.i., Academy of Sciences of the Czech Republic, Vídeňská 1083, CZ-142 20 Prague, Czech Republic.

<sup>d</sup> Central Laboratories, University of Chemistry and Technology, Technická 5, CZ-166 28 Prague, Czech Republic.

## Table of contents:

|                                                                                                        |     |
|--------------------------------------------------------------------------------------------------------|-----|
| 1. Experimental.....                                                                                   | S2  |
| 1.1 General.....                                                                                       | S2  |
| 1.2 Chemicals.....                                                                                     | S3  |
| 1.3 Synthetic procedures.....                                                                          | S4  |
| 2. Supplementary results.....                                                                          | S14 |
| 2.1 Asymmetric hydrogenation experiments.....                                                          | S14 |
| 2.2 Synthesis of <b>G</b> and <b>H</b> , structural elucidation of <b>13a-c</b> .....                  | S16 |
| 2.3 X-ray diffraction analysis of complex <b>G</b> .....                                               | S17 |
| 3. References.....                                                                                     | S19 |
| 4. Copies of NMR spectra.....                                                                          | S20 |
| 4.1 4-(4-methylcyclohexa-1,4-dienyl)butan-1-ol ( <b>13a-c</b> ).....                                   | S20 |
| 4.2 $[(\eta^6\text{-}(4\text{-}(p\text{-methylphenyl)butanol)RuCl}_2)_2$ ( <b>14a,b</b> ).....         | S22 |
| 4.3 $[\text{RuCl}(\eta^6\text{-}(p\text{-methylphenyl)butanol})(S,S)\text{-TsDPEN}]$ ( <b>G</b> )..... | S24 |
| 4.4 4-(4-methylcyclohexa-1,4-dienyl)butane ( <b>15a-c</b> ).....                                       | S26 |
| 4.5 $[(\eta^6\text{-}(4\text{-}(p\text{-methylphenyl)butane)RuCl}_2)_2$ ( <b>16a,b</b> ).....          | S28 |
| 4.6 $[\text{RuCl}(\eta^6\text{-}(p\text{-methylphenyl)butane})(S,S)\text{-TsDPEN}]$ ( <b>H</b> ).....  | S30 |

# 1. Experimental

## 1.1 General

Reactions with oxygen- and moisture-sensitive materials were carried out under argon atmosphere using standard Schlenk techniques. Solvents were dried using activated molecular sieves (4Å).

<sup>1</sup>H and <sup>13</sup>C NMR spectra were recorded on Bruker AVANCE III 400 MHz, 600 MHz and 700 MHz spectrometers with reference to the solvent residual signal as an internal standard (CD<sub>3</sub>CN:  $\delta_{\text{H}}$  1.950 ppm,  $\delta_{\text{C}}$  118.69 and 1.39 ppm, DMSO-*d*<sub>6</sub>:  $\delta_{\text{H}}$  2.500 ppm,  $\delta_{\text{C}}$  39.600 ppm, CDCl<sub>3</sub>:  $\delta_{\text{H}}$  7.265 ppm,  $\delta_{\text{C}}$  77.00 ppm, CD<sub>2</sub>Cl<sub>2</sub>:  $\delta_{\text{H}}$  5.320 ppm,  $\delta_{\text{C}}$  54.00 ppm). <sup>1</sup>H NMR, <sup>13</sup>C NMR, COSY, gHSQCAD, gHMBCAD and 2D J-resolved spectra were measured using the manufacturers' software (Topspin 2.1 and 3.2, Bruker Biospin GmbH, Rheinstetten, Germany). The chemical shifts are given in  $\delta$  scale [ppm] and coupling constants in Hz. The digital resolution enabled reporting the  $\delta$  of <sup>1</sup>H to 3, coupling constants to 1, and <sup>13</sup>C to 2 decimal places. Signals assigned from 2D experiments are reported to 2 (<sup>1</sup>H) and 1 (<sup>13</sup>C) decimal places, respectively.

High resolution mass spectrometry measurements were carried out on LTQ Orbitrap Velos (Thermo Fisher Scientific, USA), UltrafleXtreme™ MALDI-TOF/TOF (Bruker Daltonics, Germany) and GC-MS (Agilent 7890A GC + OA-TOF Waters GCT Premier MS) spectrometers. Electrospray ionization (ESI), matrix-assisted laser desorption/ionization (MALDI), or atmospheric pressure chemical ionization (APCI) were used as an ion sources.

For imines **1–6**, GC analyses were carried out on a Varian CP-3800 GC equipped with a Varian 1177 autosampler, FID and a non-polar column (Varian VF-1, 60 m × 0.25 mm × 0.25  $\mu$ m). Nitrogen (99.99%) was used as the carrier gas at a flow rate of 0.5 mL/min. The injector was heated to 300 °C, the injected volume was 1  $\mu$ L and split ratio 1:25. The detector was heated to 270 °C for the measurement of conversion and 250 °C for the analysis of *ee* using a pre-column derivatization method previously described by us<sup>9e</sup>. In the case of **7–12**, the conversion and *ee* were acquired on a Agilent 7693/7890 GC equipped with the chiral J&W CycloSil™-B (30 m × 0.25 mm × 0.25  $\mu$ m) column, Agilent 5975C Triple-Axis MSD detector and helium as the carrier gas.

IR spectra were measured on Nicolet 6700 FTIR instrument.

Crystallographic measurements were done with four circle CCD diffractometer Gemini by Oxford Diffraction, Ltd., with graphite monochromated Cu K $\alpha$  radiation ( $\lambda$  = 1.54187 Å). The crystal structure was solved by charge flipping method using program Superflip<sup>1</sup> and refined with the Jana2006 program package<sup>2</sup> by full-matrix least squares technique on F. The molecular structure plot was prepared using ORTEP III.<sup>3</sup> Supramolecular interactions were viewed in Mercury.<sup>4</sup>

## 1.2 Chemicals

The following compounds were purchased from commercial sources and used as received:

(*S,S*)-*N*-*p*-toluenesulfonyl-1,2-diphenylethylenediamine (98 %, ABCR),  
 Dichloro( $\eta^5$ -Cp\*)rhodium(I) dimer (99 %, Strem Chemicals),  
 Dichloro( $\eta^6$ -*p*-cymene)ruthenium(II) dimer (Sigma-Aldrich),  
 [RuCl( $\eta^6$ -*p*-cymene)(*S,S*)-TsDPEN] (**A**, Sigma-Aldrich),  
 [RuCl( $\eta^6$ -mesitylene)(*S,S*)-TsDPEN] (**C**, Sigma-Aldrich),  
 [RuCl(*S,S*)-Teth-TsDPEN] (**D**, Strem Chemicals),  
 [RuCl(*S,S*)-Ts-DENEB] (**E**, Strem Chemicals),  
 6,7-diethoxy-1-methyl-3,4-dihydroisoquinoline (**7**, Acros Organics),  
 7-methoxy-1-methyl-3,4-dihydro- $\beta$ -carboline (harmaline, **11**, TCI).

The following known compounds were synthesized according to previously reported procedures:

6,7-dimethoxy-1-methyl-3,4-dihydroisoquinoline (**1**),<sup>9b</sup>  
 1-methyl-3,4-dihydroisoquinoline (**2**),<sup>9b</sup>  
 6-methoxy-1-methyl-3,4-dihydroisoquinoline (**3**),<sup>9b</sup>  
 7-methoxy-1-methyl-3,4-dihydroisoquinoline (**4**),<sup>9b</sup>  
 1-phenyl-3,4-dihydroisoquinoline (**5**),<sup>9f</sup>  
 1-(4-trifluoromethylphenyl)-3,4-dihydroisoquinoline (**6**),<sup>9f</sup>  
 6,7-dimethoxy-1-isopropyl-3,4-dihydroisoquinoline (**8**),<sup>9g</sup>  
 1-isopropyl-3,4-dihydroisoquinoline (**9**),<sup>9g</sup>  
 1-methyl-3,4-dihydro- $\beta$ -carboline (harmalane, **10**),<sup>9h</sup>  
 3-methyl-1,2-benzisothiazole-1,1-dioxide (**12**).<sup>9i</sup>

The syntheses of the following compounds are based on published procedures:

[Ru( $\eta^6$ -*p*-cymene)(HN-CHPhCHPhNSO<sub>2</sub>C<sub>6</sub>H<sub>4</sub>-*p*-CH<sub>3</sub>)] (**B**),<sup>5</sup>  
 [RhCl( $\eta^5$ -Cp\*)(*S,S*)-TsDPEN] (**F**),<sup>6a</sup>  
 4-(4-methylcyclohexa-1,4-dienyl)butan-1-ol (**13a**),<sup>7</sup>  
 [( $\eta^6$ -(4-(*p*-methylphenyl)butanol)RuCl<sub>2</sub>)<sub>2</sub>] (**14a**),<sup>8</sup>  
 4-(4-methylcyclohexa-1,4-dienyl)butane (**15a**),<sup>7</sup>  
 [RuCl( $\eta^6$ -(*p*-methylphenyl)butanol)(*S,S*)-TsDPEN] (**G**),<sup>6b</sup>  
 [RuCl( $\eta^6$ -(*p*-methylphenyl)butane)(*S,S*)-TsDPEN] (**H**).<sup>6b</sup>

## 1.3 Synthetic procedures

### 1.3.1 Synthesis of $[\text{Ru}(\eta^6\text{-}p\text{-cymene})(\text{HN-CHPhCHPhNSO}_2\text{C}_6\text{H}_4\text{-}p\text{-CH}_3)]$ (**B**)

$[\text{RuCl}_2(\eta^6\text{-}p\text{-cymene})]_2$  (125.4 mg, 0.197 mmol), (*S,S*)-TsDPEN (150.0 mg, 0.409 mmol) were dissolved in dichloromethane (2.9 mL), KOH (163.8 mg, 2.920 mmol) was added and the mixture was stirred at room temperature for 5 min. The reaction mixture was washed with water (2.9 mL), dried over  $\text{CaH}_2$  and filtered. The solvent was evaporated under reduced pressure to afford a dark purple solid. Yield: 148 mg, (61 %).

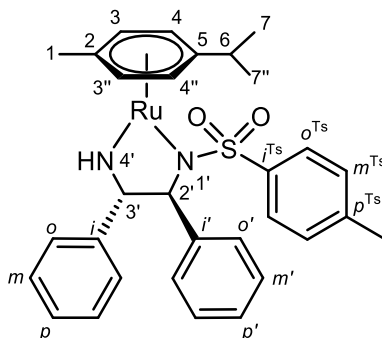

$^1\text{H}$  NMR (600.23 MHz,  $\text{CD}_3\text{CN}$ , 300.0 K):  $\delta$  1.201 (3H, d,  $J = 6.9$ , H-7"), 1.292 (3H, d,  $J = 6.9$ , H-7), 2.146 (3H, s, H-1), 2.296 (3H, s,  $\text{CH}_3\text{-}para^{\text{Ts}}$ ), 2.642 (1H, dd,  $J = 6.9, 6.9$ , H-6), 3.938 (1H, d,  $J = 4.9$ , H-3'), 4.286 (1H, s, H-2'), 5.328 (1H, d,  $J = 6.0$ , H-4), 5.414 (1H, d,  $J = 6.0$ , H-3"), 5.627 (1H, d,  $J = 6.0$ , H-4"), 5.768 (1H, d,  $J = 6.0$ , H-3), 6.945 (2H, m, H-*meta*<sup>Ts</sup>), 7.125 (2H, m, H-*ortho*), 7.15 (2H, m, H-*meta*), 7.17 (2H, m, H-*para*, H-*para*'), 7.211 (2H, m, H-*ortho*<sup>Ts</sup>), 7.248 (2H, m, H-*meta*'), 7.443 (1H, br. s, H-4'), 7.482 (2H, m, H-*ortho*').

$^{13}\text{C}$  NMR (150.93 MHz,  $\text{CD}_3\text{CN}$ , 300.0 K):  $\delta$  20.07 (C-1), 21.31 ( $\text{CH}_3\text{-}para^{\text{Ts}}$ ), 23.41 (C-7"), 23.57 (C-7), 32.71 (C-6), 72.33 (C-2'), 77.00 (C-4), 80.59 (C-4"), 81.54 (C-3"), 81.96 (C-3'), 84.74 (C-3), 89.06 (C-2), 100.04 (C-5), 127.09 (C-*para*'), 127.32 (C-*ortho*<sup>Ts</sup>), 127.40 (C-*ortho*), 127.65 (C-*para*), 128.06 (C-*ortho*'), 128.38 (C-*meta*'), 128.83 (C-*meta*), 129.46 (C-*meta*<sup>Ts</sup>), 141.35 (C-*para*<sup>Ts</sup>), 143.81 (C-*ipso*<sup>Ts</sup>), 145.61 (C-*ipso*), 148.45 (C-*ipso*').

HRMS (ESI<sup>+</sup>) calculated for  $\text{C}_{31}\text{H}_{35}\text{N}_2\text{O}_2\text{RuS}$   $[\text{M}+\text{H}]^+$ : 601.1457; found: 601.1459.



### 1.3.2 Synthesis of $[\text{RhCl}(\eta^5\text{-Cp}^*)(S,S)\text{-TsDPEN}]$ (F)

$[\text{RhCl}_2\text{Cp}^*]_2$  (154.5 mg, 0.25 mmol) and  $(S,S)$ -TsDPEN (183 mg, 0.5 mmol) were dissolved in dichloromethane (5 mL), triethylamine (139.1  $\mu\text{L}$ , 101 mg, 1 mmol) was added and the solution was stirred for 20 min at room temperature. The reaction mixture was washed with water (2.5 mL), dried over  $\text{MgSO}_4$  and filtered. The solvent was evaporated under reduced pressure to give an orange solid. Yield: 300 mg, 94 %. m.p. 219–220  $^\circ\text{C}$  (dec.).

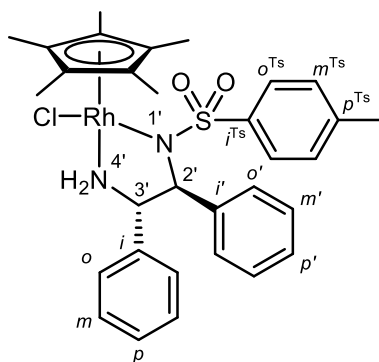

$^1\text{H}$  NMR (400.00 MHz,  $\text{CD}_2\text{Cl}_2$ , 303.2 K):  $\delta$  1.817 (15H, s,  $\text{CH}_3^{\text{Cp}}$ ), 2.291 (3H, s,  $\text{CH}_3\text{-para}^{\text{Ts}}$ ), 3.447 (1H, m, H-4'), 3.713 (1H, ddd,  $J = 10.8, 13.6, 2.3$ , H-3'), 3.903 (1H, m, H-4'), 3.972 (1H, d,  $J = 10.8$ , H-2'), 6.29 (2H, m, H-ortho), 6.653 (2H, m, H-ortho'), 6.780 (2H, m, H-meta'), 6.85 (2H, m, H-meta<sup>Ts</sup>), 6.86 (1H, m, H-para'), 7.13 (2H, m, H-meta), 7.14 (1H, m, H-para), 7.311 (2H, m, H-ortho<sup>Ts</sup>).

$^{13}\text{C}$  NMR (100.59 MHz,  $\text{CD}_2\text{Cl}_2$ , 303.2 K):  $\delta$  9.98 ( $\text{CH}_3^{\text{Cp}}$ ), 21.42 ( $\text{CH}_3\text{-para}^{\text{Ts}}$ ), 69.91 (C-2'), 72.14 (C-3'), 94.52 ( $\text{C}^{\text{Cp}}$ ), 94.61 ( $\text{C}^{\text{Cp}}$ ), 126.88 (C-para'), 127.58 (C-meta'), 127.62 (C-ortho), 128.32 (C-meta<sup>Ts</sup>), 128.55 (C-ortho<sup>Ts</sup>), 128.83 (C-para), 129.01 (C-meta), 129.35 (C-ortho'), 139.89 (C-para<sup>Ts</sup>), 140.06 (C-ipso), 140.32 (C-ipso'), 142.38 (C-ipso<sup>Ts</sup>).

HRMS (ESI<sup>+</sup>) calculated for  $\text{C}_{31}\text{H}_{36}\text{N}_2\text{O}_2\text{RhS}$   $[\text{M}-\text{Cl}]^+$ : 603.1553; found 603.1556.

### 1.3.3 Synthesis of 4-(4-methylcyclohexa-1,4-dienyl)butan-1-ol (**13a**)

1,2-Bis(diphenylphosphino)ethane (DPPE) (102.0 mg, 0.256 mmol), CoBr<sub>2</sub> (54.3 mg, 0.248 mmol), ZnI<sub>2</sub> (157.6 mg, 0.494 mmol) and Zn powder (31.8 mg, 0.486 mmol) were mixed with tetrahydrofuran (33 mL) at 70 °C and the mixture was stirred for 15 min. Isoprene (1.00 g, 14.7 mmol, 1.47 mL) and 5-hexyn-1-ol (1.18 g, 12.1 mmol, 1.33 mL) were added and then further stirred for 2 hours at 70 °C. The solvent was evaporated under reduced pressure and the crude oily product was purified by flash column chromatography (hexane/EtOAc = 3:1) to afford colourless oil consisting of **13a** and side-products **13b** and **13c**. Yield: 1.86 g (93 %).

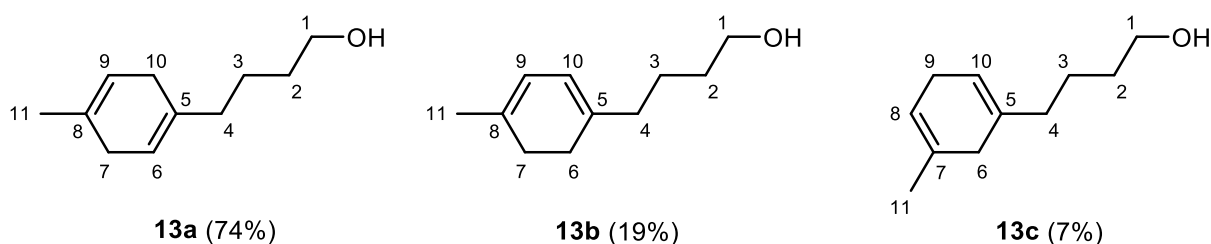

**13a**: <sup>1</sup>H NMR (600.23 MHz, CDCl<sub>3</sub>, 293.2 K): δ 1.479 (2H, m, H-3), 1.56 (2H, m, H-2), 1.663 (3H, s, H-11), 1.995 (2H, dd, *J* = 7.5, 7.5, H-4), 2.574 (4H, s, H-7, H-10), 3.635 (2H, dd, *J* = 6.4, 6.4, H-1), 5.407 (1H, s, H-9), 5.421 (1H, s, H-6).

<sup>13</sup>C NMR (150.93 MHz, CDCl<sub>3</sub>, 293.2 K): δ 22.98 (C-11), 23.50 (C-3), 29.81 (C-10), 31.57 (C-7), 32.35 (C-2), 36.73 (C-4), 62.83 (C-1), 118.45 (C-6), 118.57 (C-9), 131.22 (C-8), 134.60 (C-5).

**13b**: <sup>1</sup>H NMR (600.23 MHz, CDCl<sub>3</sub>, 293.2 K): δ 1.493 (2H, m, H-3), 1.545 (2H, m, H-2), 1.758 (3H, s, H-11), 2.076 (2H, dd, *J* = 7.4, 7.4, H-4), 2.093 (2H, m, H-7), 2.10 (2H, m, H-6), 3.635 (2H, dd, *J* = 6.4, 6.4, H-1), 5.582 (1H, d, *J* = 6.6, H-10), 5.590 (1H, d, *J* = 6.6, H-9).

<sup>13</sup>C NMR (150.93 MHz, CDCl<sub>3</sub>, 293.2 K): δ 22.92 (C-11), 23.73 (C-3), 26.92 (C-6), 28.66 (C-7), 32.34 (C-2), 36.61 (C-4), 62.81 (C-1), 119.02 (C-10), 119.25 (C-9), 133.01 (C-8), 135.97 (C-5).

**13c**: <sup>1</sup>H NMR (600.23 MHz, CDCl<sub>3</sub>, 293.2 K): δ 1.543 (2H, m, H-3), 1.565 (2H, m, H-2), 1.676 (3H, s, H-11), 2.008 (2H, m, H-4), 2.472 (2H, t, *J* = 8.0, H-6), 2.667 (2H, br. s., H-9), 3.635 (2H, m, H-1), 5.421 (2H, m, H-8, H-10).

<sup>13</sup>C NMR (150.93 MHz, CDCl<sub>3</sub>, 293.2 K): δ 23.19 (C-11), 23.39 (C-3), 27.64 (C-9), 32.36 (C-2), 33.79 (C-6), 36.86 (C-4), 62.83 (C-1), 118.29, 118.48 (C-8, C-10), 131.20, 131.22 (C-5, C-7).

HRMS (ESI<sup>+</sup>) calculated for C<sub>11</sub>H<sub>17</sub>O [M-H]<sup>-</sup>: 165.1279; found: 165.1277.

IR: ν<sub>max</sub> = 3622, 3442, 3082, 3011, 2935, 2879, 2861, 2820, 1662, 1610, 1475, 1448, 1439, 1384, 1053, 1022 cm<sup>-1</sup>.

### 1.3.4 Synthesis of $[(\eta^6\text{-}(4\text{-}(p\text{-tolyl)butan-1-ol})\text{RuCl}_2)_2]$ (**14a**)

Diene **13a** (1.50 g, 9.02 mmol) was dissolved in ethanol (70 mL) and  $\text{RuCl}_3 \cdot x\text{H}_2\text{O}$  (387 mg, 1.48 mmol, trihydrate assumed) was added. The reaction mixture was stirred for 18 h under reflux. After the reaction, the mixture was hot-filtered to remove Ru black. The volatiles were removed on a rotary evaporator giving red-brown oil. The oil was washed with cold and degassed EtOH ( $3 \times 3$  mL) and hexane ( $3 \times 3$  mL). The resulting red-brown solid was dried in vacuum (1 Torr). Yield: 372 mg (75 %). M.p. 168–171 °C (dec.).

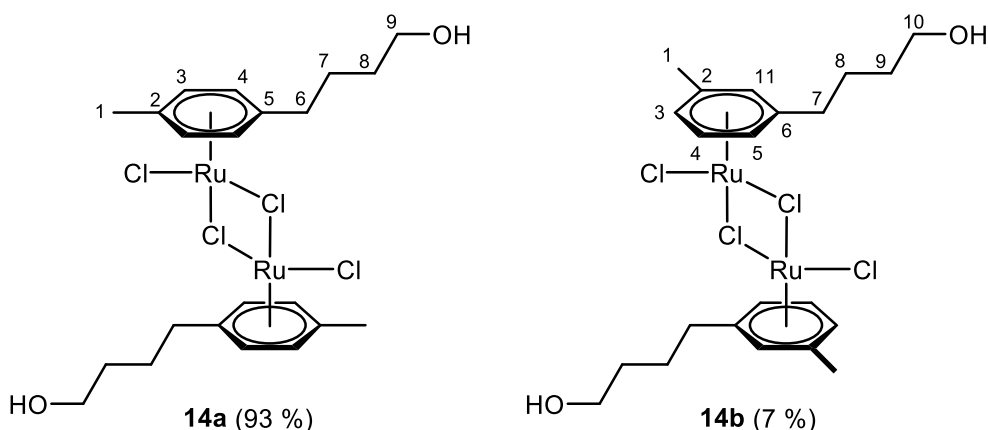

**14a**:  $^1\text{H}$  NMR (400.00 MHz,  $\text{DMSO-}d_6$ , 303.2 K):  $\delta$  1.461 (2H, m, H-8), 1.584 (2H, m, H-7), 2.082 (3H, s, H-1), 2.383 (2H, t,  $J = 7.7$ , H-6), 3.403 (2H, t,  $J = 6.3$ , H-9), 5.751 (2H, m, H-3), 5.786 (2H, m, H-4).

$^{13}\text{C}$  NMR (100.58 MHz,  $\text{DMSO-}d_6$ , 303.2 K):  $\delta$  17.86 (C-1), 25.89 (C-7), 31.69 (C-6), 32.00 (C-8), 60.38 (C-9), 86.93 (C-3), 87.01 (C-4), 99.62 (C-2), 101.71 (C-5).

**14b**:  $^1\text{H}$  NMR (400.00 MHz,  $\text{DMSO-}d_6$ , 303.2 K):  $\delta$  1.565 (2H, m, H-9), 1.576 (2H, m, H-8), 2.129 (3H, s, H-1), 2.423 (2H, br. t,  $J = 7.6$ , H-7), 3.412 (2H, t,  $J = 6.4$ , H-10), 5.449 (1H, d,  $J = 5.7$ , H-3), 5.484 (1H, d,  $J = 5.7$ , H-5), 5.640 (1H, br. s., H-11), 5.964 (1H, t,  $J = 5.7$ , H-4).

$^{13}\text{C}$  NMR (100.58 MHz,  $\text{DMSO-}d_6$ , 303.2 K):  $\delta$  18.52 (C-1), 25.64 (C-8), 32.10 (C-9), 32.47 (C-7), 60.39 (C-10), 80.19 (C-5), 81.09 (C-3), 84.18 (C-11), 88.33 (C-4), 106.58 (C-2), 109.62 (C-6).

HRMS (ESI<sup>+</sup>) calculated for  $\text{C}_{22}\text{H}_{32}\text{O}_2\text{Ru}_2\text{Cl}_3$  [M-Cl]<sup>+</sup>: 636.9555; found 636.9556.

IR:  $\nu_{\text{max}}$  = 3482, 3067, 3047, 3008, 2944, 2869, 1530, 1495, 1450, 1377, 1065, 1033, 809  $\text{cm}^{-1}$ .

### 1.3.5 Synthesis of [RuCl( $\eta^6$ -(4-(*p*-tolyl)butan-1-ol)](*S,S*)-TsDPEN] (**G**)

Dimer **14a** (250.0 mg, 0.372 mmol) and ligand (*S,S*)-TsDPEN (272.5 mg, 0.744 mmol) were dissolved in dichloromethane (8.3 mL). Triethylamine (207.4  $\mu$ L, 150.5 mg, 1.487 mmol) was added thereto and the solution was stirred for 1 hour at room temperature. The orange precipitate was filtered off, washed with water (3  $\times$  2 mL) and dried in vacuum (1 Torr). Yield: 415 mg, (84 %). m.p. 205–207  $^{\circ}$ C (dec.).

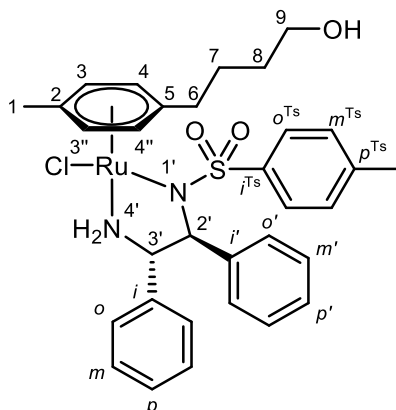

$^1\text{H}$  NMR (700.13 MHz, DMSO- $d_6$ , 303.2 K):  $\delta$  1.542 (2H, m, H-8), 1.693 (2H, m, H-7), 2.214 (3H, s, CH<sub>3</sub>-*para*<sup>Ts</sup>), 2.247 (3H, s, H-1), 2.568 (1H, m, H-6u), 2.599 (1H, m, H-6d), 3.179 (1H, dd,  $J$  = 10.3, 12.5, H-4'), 3.474 (2H, m, H-9), 3.557 (1H, m, H-3'), 3.708 (1H, d,  $J$  = 11.2, H-2'), 4.455 (1H, t,  $J$  = 5.1, 9-OH), 5.496 (1H, d,  $J$  = 5.6, H-3), 5.595 (2H, s, H-3', H-4"), 5.641 (1H, d,  $J$  = 5.6, H-4), 6.530 (2H, d,  $J$  = 7.4, H-*ortho*'), 6.673 (2H, dd,  $J$  = 7.4, 7.4, H-*meta*'), 6.778 (1H, t,  $J$  = 7.4, H-*para*'), 6.805 (2H, m, H-*ortho*), 6.819 (2H, d,  $J$  = 7.9, H-*meta*<sup>Ts</sup>), 7.043 (2H, d,  $J$  = 7.9, H-*ortho*<sup>Ts</sup>), 7.10 (3H, m, H-*meta*, H-*para*), 7.354 (1H, d,  $J$  = 7.8, H-4').

$^{13}\text{C}$  NMR (176.06 MHz, DMSO- $d_6$ , 303.2 K):  $\delta$  18.35 (C-1), 20.82 (CH<sub>3</sub>-*para*<sup>Ts</sup>), 26.49 (C-7), 32.11 (C-6), 32.17 (C-8), 60.48 (C-9), 68.58 (C-2'), 71.10 (C-3'), 81.95 (C-3"), 81.97 (C-4), 83.17 (C-3), 83.95 (C-4"), 95.09 (C-2), 96.65 (C-5), 125.96 (C-*para*'), 126.62 (C-*meta*', C-*ortho*<sup>Ts</sup>), 127.15 (C-*ortho*), 127.56 (C-*meta*<sup>Ts</sup>), 127.64 (C-*para*), 128.19 (C-*meta*), 128.93 (C-*ortho*'), 138.11 (C-*para*<sup>Ts</sup>), 139.24 (C-*ipso*'), 139.90 (C-*ipso*), 143.78 (C-*ipso*<sup>Ts</sup>).

HRMS (ESI<sup>+</sup>) calculated for C<sub>32</sub>H<sub>37</sub>N<sub>2</sub>O<sub>3</sub>RuS [M-Cl]<sup>+</sup>: 631.1568; found 631.1569.

IR:  $\nu_{\text{max}}$  = 3455, 3279, 3226, 3084, 3064, 3030, 2933, 2861, 1599, 1494, 1453, 1378, 1270, 1128, 1105, 1084, 1039, 821, 813, 689 cm<sup>-1</sup>.

$[\alpha]^{20}_{589}$  = +66.7 $^{\circ}$  ( $c$  0.397, DMSO).

### 1.3.6 Synthesis of 4-(4-methylcyclohexa-1,4-dienyl)butane (**15a**)

DPPE (102.0 mg, 0.256 mmol), CoBr<sub>2</sub> (54.3 mg, 0.248 mmol), ZnI<sub>2</sub> (157.6 mg, 0.494 mmol) and Zn powder (31.8 mg, 0.486 mmol) were mixed with tetrahydrofuran (33 mL) at 70 °C and the mixture was stirred for 15 min. Isoprene (1.00 g, 14.7 mmol, 1.47 mL) and 1-hexyne (1.00 g, 12.1 mmol, 1.39 mL) were added and then further stirred for 2 hours at 70 °C. The solvent was evaporated under reduced pressure and the crude oily product was purified by flash column chromatography (hexane/EtOAc = 3:1) to afford colourless oil consisting of **15a-c**.<sup>1</sup> Yield: 1.54 g (84 %).

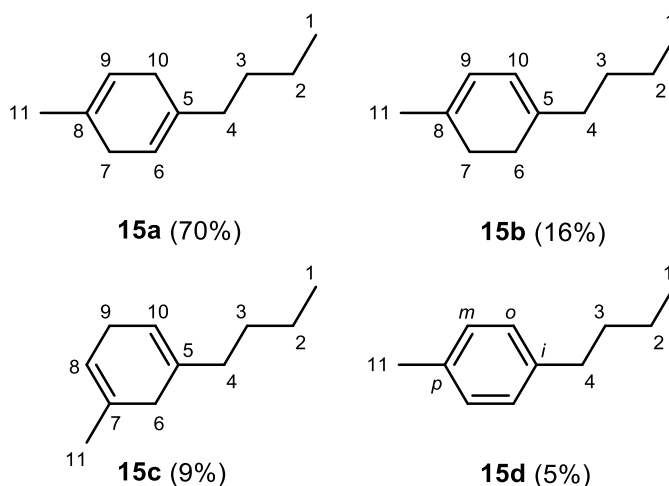

**15a:** <sup>1</sup>H NMR (600.23 MHz, CDCl<sub>3</sub>, 303.2 K): δ 0.899 (3H, t, *J* = 7.2, H-1), 1.306 (2H, m, H-2), 1.389 (2H, m, H-3), 1.674 (3H, s, H-11), 1.968 (2H, t, *J* = 7.5, H-4), 2.584 (4H, m, H-7, H-10), 5.416 (1H, m, H-6), 5.421 (1H, m, H-9).

<sup>13</sup>C NMR (150.93 MHz, CDCl<sub>3</sub>, 303.2K): δ 14.01 (C-1), 22.44 (C-2), 23.05 (C-11), 29.70 (C-3), 29.92 (C-10), 31.61 (C-7), 36.81 (C-4), 117.97 (C-6), 118.72 (C-9), 131.28 (C-8), 135.15 (C-5).

**15b:** <sup>1</sup>H NMR (600.23 MHz, CDCl<sub>3</sub>, 303.2 K): δ 0.899 (3H, t, *J* = 7.2, H-1), 1.306 (2H, m, H-2), 1.398 (2H, m, H-3), 1.767 (3H, s, H-11), 2.049 (2H, t, *J* = 7.6, H-4), 2.102 (4H, m, H-6, H-7), 5.578 (1H, m, H-10), 5.602 (1H, m, H-9).

<sup>13</sup>C NMR (150.93 MHz, CDCl<sub>3</sub>, 303.2K): δ 14.00 (C-1), 22.41 (C-2), 22.98 (C-11), 27.05 (C-6), 28.72 (C-7), 29.88 (C-3), 36.69 (C-4), 118.60 (C-10), 119.34 (C-9), 132.83 (C-8), 136.73 (C-5).

**15c:** <sup>1</sup>H NMR (600.23 MHz, CDCl<sub>3</sub>, 303.2 K): δ 0.899 (3H, m, H-1), 1.315 (2H, m, H-2), 1.375 (2H, m, H-3) 1.687 (3H, s, H-11), 1.979 (2H, m, H-4), 2.482 (2H, t, *J* = 8.0, H-6), 2.678 (2H, br. s., H-9), 5.412 (2H, m, H-8, H-10).

<sup>13</sup>C NMR (150.93 MHz, CDCl<sub>3</sub>, 303.2K): δ 14.01 (C-1), 22.46 (C-2), 23.26 (C-11), 27.69 (C-9), 29.58 (C-3), 33.89 (C-6) 36.95 (C-4), 117.80 (C-10), 118.48 (C-8), 131.37 (C-7, C-5).

<sup>1</sup> Small amount (**9d**) of aromatic impurity was formed as a decomposition product, which has been assigned for the sake of completeness.

**15d:**  $^1\text{H}$  NMR (600.23 MHz,  $\text{CDCl}_3$ , 303.2 K):  $\delta$  0.899 (3H, m, H-1), 1.291 (2H, m, H-2), 1.577 (2H, m, H-3), 2.318 (3H, s, H-*para*- $\text{CH}_3$ ), 2.570 (2H, t,  $J = 7.9$ , H-4), 7.074 (2H, m, H-*ortho*), 7.090 (2H, m, H-*meta*).

$^{13}\text{C}$  NMR (150.93 MHz,  $\text{CDCl}_3$ , 303.2K):  $\delta$  13.96 (C-1), 20.98 (C-*para*- $\text{CH}_3$ ), 22.36 (C-2), 33.80 (C-3), 35.19 (C-4), 128.26 (C-*ortho*), 128.88 (C-*meta*), 134.91 (C-*para*), 139.81 (C-*ipso*).

HRMS (EI) calculated for  $\text{C}_{11}\text{H}_{18}$  [ $\text{M}^{++}$ ]: 150.1409; found 150.1410.

IR:  $\nu_{\text{max}}$  = 3080, 3036, 2960, 2930, 2873, 2859, 2820, 1662, 1610, 1467, 1457, 1379  $\text{cm}^{-1}$ .

### 1.3.7 Synthesis of $[(\eta^6\text{-}(1\text{-butyl-4-methylbenzene})\text{RuCl}_2)_2]$ (**16a**)

Diene **15a** (1.547 g, 10.3 mmol) was dissolved in ethanol (80 mL) and  $\text{RuCl}_3 \cdot x\text{H}_2\text{O}$  (538 mg, 2.1 mmol, trihydrate assumed) was added. The reaction mixture was stirred for 18 h under reflux. After the reaction, the mixture was hot-filtered to remove Ru black. The volatiles were removed on a rotary evaporator giving red-brown oil. The oil was washed with cold and degassed EtOH ( $3 \times 3$  mL) and hexane ( $3 \times 3$  mL). The resulting red-brown solid was dried in vacuum (1 Torr). Yield: 988 mg (75 %). M.p. 192 °C (dec.).

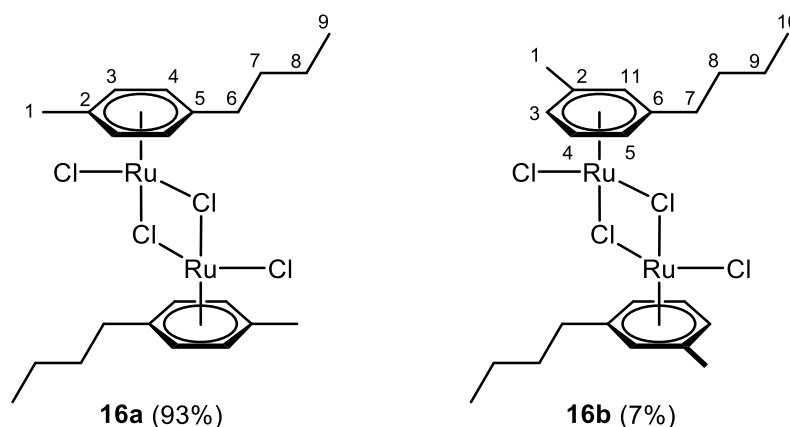

**16a:**  $^1\text{H}$  NMR (700.13 MHz,  $\text{DMSO-}d_6$ , 303.2 K):  $\delta$  0.894 (3H, t,  $J = 7.3$ , H-9), 1.333 (2H, m, H-8), 1.539 (2H, m, H-7), 2.080 (3H, s, H-1), 2.379 (2H, t,  $J = 7.4$ , H-6), 5.745 (2H, d,  $J = 5.5$ , H-3), 5.789 (2H, d,  $J = 5.5$ , H-4).

$^{13}\text{C}$  NMR (176.06 MHz,  $\text{DMSO-}d_6$ , 303.2K):  $\delta$  13.76 (C-9), 17.85 (C-1), 21.85 (C-8), 31.27 (C-7), 31.55 (C-6), 86.92 (C-3), 86.98 (C-4), 99.59 (C-2), 101.70 (C-5).

**16b:**  $^1\text{H}$  NMR (700.13 MHz,  $\text{DMSO-}d_6$ , 303.2 K):  $\delta$  0.893 (3H, m, H-10), 1.347 (2H, m, H-9), 1.538 (2H, m, H-8), 2.126 (3H, s, H-1), 2.418 (2H, t,  $J = 7.6$ , H-7), 5.445 (1H, d,  $J = 5.2$ , H-3), 5.483 (1H, d,  $J = 5.2$ , H-5), 5.643 (1H, s, H-11), 5.958 (1H, t,  $J = 5.2$ , H-4).

$^{13}\text{C}$  NMR (176.06 MHz,  $\text{DMSO-}d_6$ , 303.2K):  $\delta$  13.78 (C-10), 18.52 (C-1), 21.96 (C-9), 31.03 (C-8), 32.35 (C-7), 80.15 (C-5), 81.06 (C-3), 84.16 (C-11), 88.32 (C-4), 106.53 (C-2), 109.55 (C-6).

HRMS (MALDI) calculated for  $\text{C}_{22}\text{H}_{32}\text{Ru}_2\text{Cl}_3$   $[\text{M}-\text{Cl}]^+$ : 604.9651; found 604.9659.

IR:  $\nu_{\text{max}} = 3067, 3045, 3009, 2951, 2927, 2868, 2859, 1530, 1497, 1466, 1377, 1034, 811 \text{ cm}^{-1}$ .





### 1.3.9 AH in batch pressure reactors – optimized setup

The substrate (44  $\mu\text{mol}$ ) was weighed into a GC vial and dissolved in methanol (0.5 mL). Trifluoroacetic acid (3.4  $\mu\text{L}$ , 44  $\mu\text{mol}$ ) was added thereto, and the mixture was stirred for 5 min. The catalyst solution (0.44  $\mu\text{mol}$  of catalyst; concentration 5.4 mg/1 mL in methanol) was added to the mixture and the vial was closed by a pierced square of Parafilm. The vial was placed in an autoclave, which was closed, purged ( $3 \times 5$  bar) and filled with hydrogen (15 bar).

After 6 h, the autoclave was opened and a sample of the reaction mixture (200  $\mu\text{L}$ ) was mixed with a saturated solution of  $\text{Na}_2\text{CO}_3$  (1 mL). The solution was extracted with diethyl ether ( $3 \times 1.5$  mL) and the organic phase was dried over  $\text{Na}_2\text{SO}_4$  for 1 h. The ether solution was stripped to dryness in a stream of air. The stripped residue was dissolved in acetonitrile (GC analysis) or acetonitrile- $d_3$  (NMR analysis).

### 1.3.10 ATH in an NMR spectrometer

The reactions were monitored *in situ* in an NMR spectrometer at 30 °C by following the same protocol as described in our previous publications.<sup>9a</sup>

Acetonitrile- $d_3$  (volume calculated so as to reach 730  $\mu\text{L}$  of total volume of the reaction mixture), formic acid (13.1  $\mu\text{L}$ , 0.347 mmol) and triethylamine (19.3  $\mu\text{L}$ , 0.139 mmol) were mixed in an NMR tube. The catalyst (0.275  $\mu\text{mol}$ ) dissolved in acetonitrile- $d_3$  (conc. 5.4 mg/mL) was added to the mixture. Finally, after 5 minutes, the substrate (55  $\mu\text{mol}$ ) was added to the reaction mixture. The reaction was followed by  $^1\text{H}$  NMR.

In the end of the kinetic experiment, a sample of the reaction mixture (200  $\mu\text{L}$ ) was mixed with a saturated solution of  $\text{Na}_2\text{CO}_3$  (1 mL). The solution was extracted with diethyl ether ( $3 \times 1.5$  mL) and the organic phase was dried over  $\text{Na}_2\text{SO}_4$  for 1 h. The ether solution was stripped to dryness in a stream of air. The stripped residue was dissolved in acetonitrile (0.8 mL) and enantioselectivity was measured by GC.<sup>9e</sup>

### 1.3.11 AH of 1 on a synthetic scale

Substrate **1** (90 mg, 0.44 mmol) was weighed into a vial and dissolved in methanol (5 mL). Trifluoroacetic acid (34  $\mu\text{L}$ , 0.44 mmol) was added thereto, and the mixture was stirred for 5 min. The catalyst solution (0.0044 mmol of catalyst; concentration 5.4 mg/1 mL in methanol) was added to the mixture, and the vial was closed by a pierced square of Parafilm. The vial was placed in an autoclave, which was closed, purged ( $3 \times 5$  bar) and filled with hydrogen (15 bar).

After 6 h, the autoclave was opened and the reaction mixture was alkalized with a solution of NaOH. The solution was extracted with diethyl ether ( $3 \times 5$  mL) and filtered through a plug of silica gel to remove the catalyst. The organic phase was dried over  $\text{Na}_2\text{SO}_4$ , filtered and evaporated. Pale yellow oil was obtained. Yield: 84 mg (92%). 97% *ee* and >95% purity.

## 2. Supplementary results

### 2.1 Asymmetric hydrogenation experiments

**Table S1.** Screening of reaction conditions in the AH of **1** with catalyst **A**.<sup>a</sup>

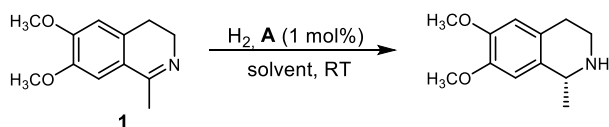

| Entry | Concentration (mM) | Volume (mL) | Solvent      | Conv (%) |
|-------|--------------------|-------------|--------------|----------|
| 1     | 44                 | 1           | acetonitrile | 0        |
| 2     | 88                 | 0.5         | acetonitrile | 0        |
| 3     | 176                | 0.25        | acetonitrile | 0        |
| 4     | 44                 | 1           | DMSO         | 2        |
| 5     | 88                 | 0.5         | DMSO         | 4        |
| 6     | 176                | 0.25        | DMSO         | 3        |
| 7     | 44                 | 1           | MeOH         | 6        |
| 8     | 88                 | 0.5         | MeOH         | 10       |
| 9     | 176                | 0.25        | MeOH         | 6        |

<sup>a</sup> Amount of substrate  $n = 44 \mu\text{mol}$ , catalyst loading 1 mol%,  $p(\text{H}_2) = 15 \text{ bar}$ , RT, 6 h.

**Table S2.** Screening of acid additives in the AH of **1** with catalyst **A**.<sup>a</sup>

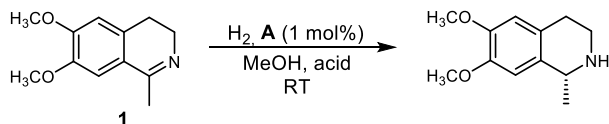

| Entry | Acid                   | Acid/Substrate <sup>b</sup> | Conv (%) |
|-------|------------------------|-----------------------------|----------|
| 1     | HBF <sub>4</sub> (48%) | 1                           | 19       |
| 2     | TfOH                   | 1                           | 9        |
| 3     | CF <sub>3</sub> COOH   | 1                           | 57       |
| 4     | CF <sub>3</sub> COOH   | 0.5                         | 18       |
| 5     | CF <sub>3</sub> COOH   | 0.75                        | 42       |
| 6     | CF <sub>3</sub> COOH   | 1.25                        | 52       |
| 7     | CF <sub>3</sub> COOH   | 1.5                         | 54       |

<sup>a</sup> Amount of substrate  $n = 44 \mu\text{mol}$ , concentration of substrate  $c = 88 \text{ mM}$ , catalyst loading 1 mol%,  $p(\text{H}_2) = 15 \text{ bar}$ , RT, 6 h. <sup>b</sup> Molar ratio.

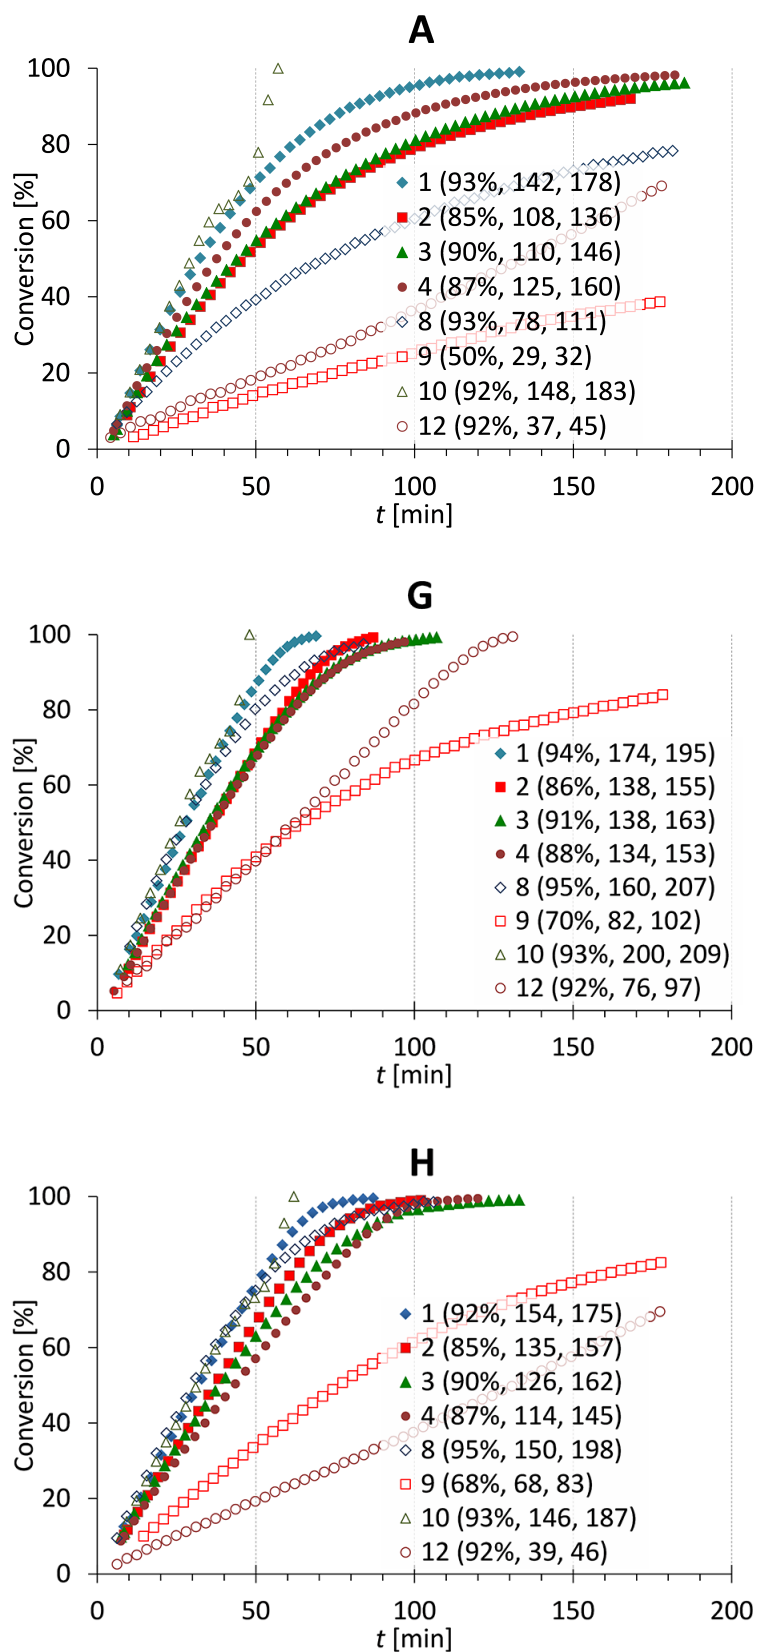

**Fig. S1** ATH of imines **1–4**, **8–10** and **12** catalysed by complexes **A**, **G** and **H** using HCOOH/Et<sub>3</sub>N (5:2) in CD<sub>3</sub>CN at 0.5 mol% catalyst loading and a temperature of 30 °C. In parentheses: *ee*, TON after 50 min, TOF at 20% conversion in h<sup>-1</sup>.

## 2.2 Synthesis of G and H, structural elucidation of 13a-c

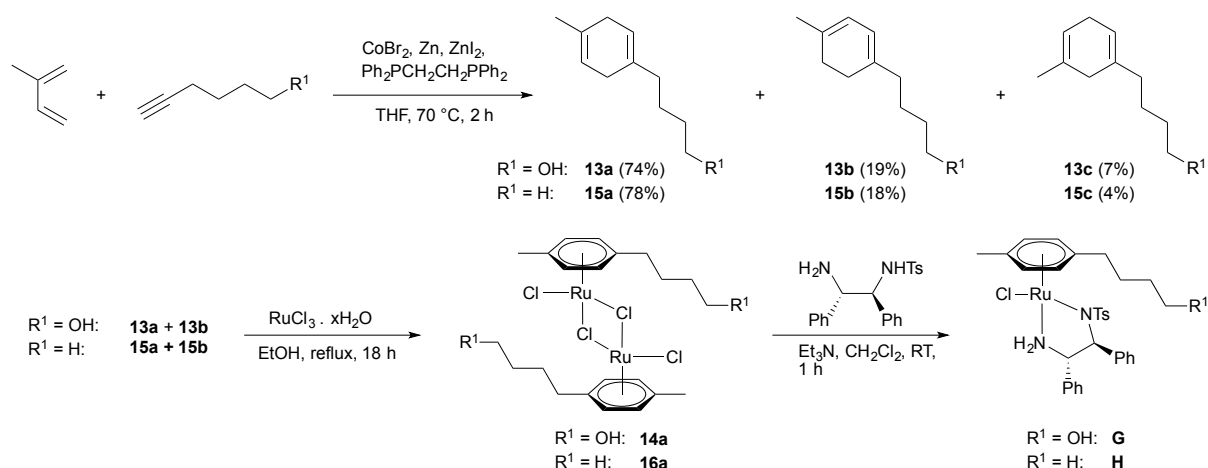

Scheme S1 Synthesis of complexes G and H.

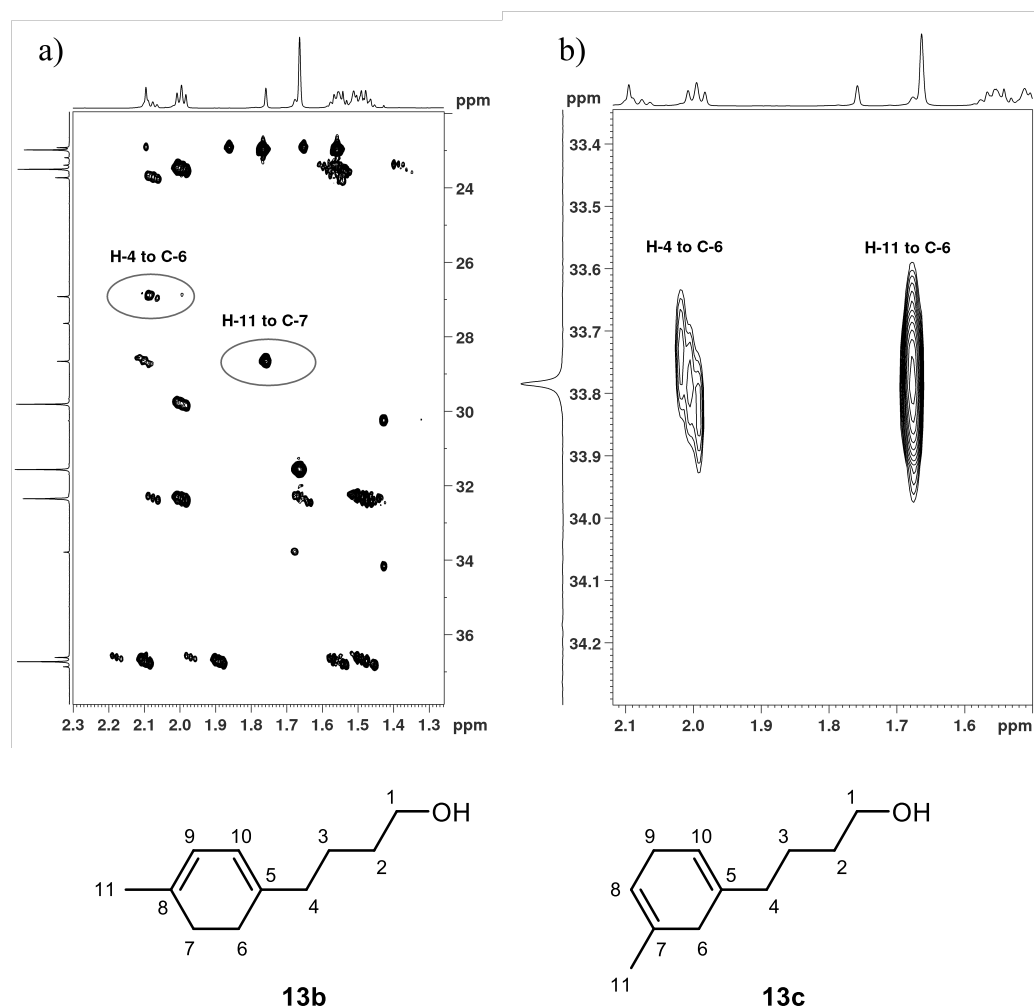

**Fig. S2** Parts of a  $^1\text{H}$ - $^{13}\text{C}$  HMBC NMR spectrum of isolated mixture of **13a-c**.  
 a) **13b**: Correlation of methyl 11 with methylene 7, correlation between methylenes 4 and 6;  
 b) **13c**: Correlation of methyl 11 and methylene 4 to common methylene 6

## 2.3 X-ray diffraction analysis of complex **G**

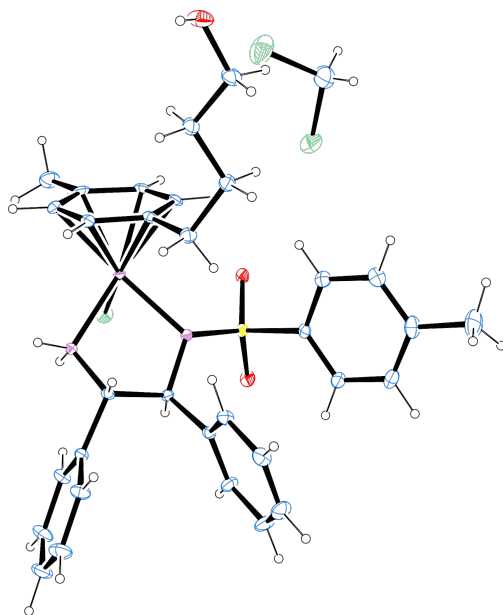

**Fig. S3** Solid-state molecular structure of complex **G**

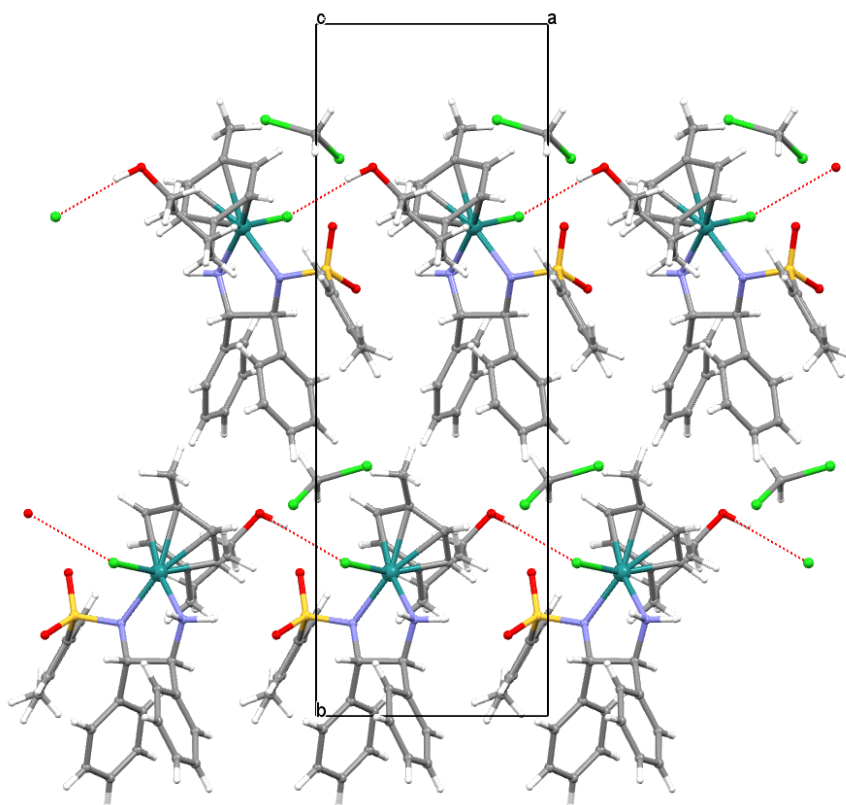

**Fig. S4** The molecule of dichloromethane crystallized with **G** in an equimolar ratio. The crystal structure was held together by O-H...Cl hydrogen bonds of 2.39(5) Å between the hydroxyl group (donor) and chloride (acceptor) as evident from the packing view down the *c* axis. Such a hydrogen bond has been observed for similar compounds, although in an intramolecular manner.<sup>10</sup>

**Table S3** Crystallographic and structure refinement for complex **G**

|                                          |                                                                                   |
|------------------------------------------|-----------------------------------------------------------------------------------|
| Empirical formula                        | C <sub>33</sub> H <sub>39</sub> Cl <sub>3</sub> N <sub>2</sub> O <sub>3</sub> RuS |
| Formula weight                           | 751.21                                                                            |
| Crystal system, space group              | monoclinic, <i>P2</i> <sub>1</sub>                                                |
| <i>T</i> (K)                             | 180                                                                               |
| <i>a</i> (Å)                             | 7.77870(10)                                                                       |
| <i>b</i> (Å)                             | 22.4690(4)                                                                        |
| <i>c</i> (Å)                             | 9.7911(2)                                                                         |
| $\beta$ (deg)                            | 104.5931(14)                                                                      |
| <i>V</i> (Å <sup>3</sup> )               | 1656.08(5)                                                                        |
| <i>Z</i>                                 | 2                                                                                 |
| $\mu$ (mm <sup>-1</sup> )                | 6.937                                                                             |
| Crystal size (mm)                        | 0.38 × 0.24 × 0.18                                                                |
| <i>T</i> <sub>min</sub>                  | 0.487                                                                             |
| <i>T</i> <sub>max</sub>                  | 1                                                                                 |
| Measured reflections                     | 35936                                                                             |
| Independent reflections                  | 6809                                                                              |
| Reflections with $I > 3\sigma(I)$        | 6754                                                                              |
| Parameters                               | 400                                                                               |
| <i>R</i> <sub>int</sub>                  | 0.034                                                                             |
| <i>S</i>                                 | 2.64                                                                              |
| $R[F^2 > 3\sigma(F^2)]$                  | 0.0291                                                                            |
| $wR(F)$                                  | 0.0405                                                                            |
| $\Delta\rho_{\max}$ (e Å <sup>-3</sup> ) | 0.44                                                                              |
| $\Delta\rho_{\min}$ (e Å <sup>-3</sup> ) | -0.91                                                                             |

The title compound crystallizes in the monoclinic space group *P2*<sub>1</sub>. The molecular structure is given in Figure 1. The single-crystal structure of C<sub>33</sub>H<sub>39</sub>Cl<sub>3</sub>N<sub>2</sub>O<sub>3</sub>RuS is built up of discrete moieties of C<sub>32</sub>H<sub>37</sub>Cl<sub>2</sub>N<sub>2</sub>O<sub>3</sub>RuS and dichloromethane with the two formula units in the asymmetric unit.

The absolute structure was tested by introducing twinning and refining volume fractions. The inversion was used as a merohedral twinning operation. In this case, the volume fraction of the inversion twin is the Flack parameter.<sup>11</sup> This parameter refined to a final value of -0.008(7), which confirms that the above configuration is the correct absolute structure.

Crystallographic data (including structure factors) for the structure reported in this article has been deposited with the Cambridge Crystallographic Center, CCDC No. 1021406. Copies of the data can be obtained free of charge on application to The Director, CCDC, 12 Union Road, Cambridge CB2 1EZ, UK, fax: +44 1223 336 033, e-mail: deposit@ccdc.cam.ac.uk or <http://www.ccdc.cam.ac.uk>.

### 3. References

---

1. L. Palatinus and G. J. Chapuis, *Appl. Cryst.*, 2007, **40**, 786–790.
2. V. Petříček, M. Dušek and L. Palatinus (2006) *JANA2006*. Institute of Physics, Czech Academy of Sciences, Prague.
3. L. J. Farrugia, *J. Appl. Crystallogr.*, 1999, **32**, 837–838.
4. C. F. Macrae, P. R. Edgington, P. McCabe, E. Pidcock, G. P. Shields, R. Taylor, M. Towler and J. van de Streek, *J. Appl. Crystallogr.*, 2006, **39**, 453–457.
5. K.-J. Haack, S. Hashiguchi, A. Fujii, T. Ikariya and R. Noyori, *Angew. Chem. Int. Ed. Engl.*, 1997, **36**, 285–288; *Angew. Chem.*, 1997, **109**, 297–300.
6. (a) J. Mao and D. C. Baker, *Org. Lett.*, 1999, **1**, 841–843; (b) T. Wang, L.-G. Zhuo, Z. Li, F. Chen, Z. Ding, Y. He, Q.-H. Fan, J. Xiang, Z.-X. Yu and A. S. C. Chan, *J. Am. Chem. Soc.*, 2011, **133**, 9878–9891.
7. T. Touge, T. Hakamata, N. Hideki, T. Kobayashi, N. Sayo, T. Saito, Y. Kayaki and T. Ikariya, *J. Am. Chem. Soc.*, 2011, **133**, 14960–14963.
8. T. Reiner, M. Waibel, A. N. Marziale, D. Jantke, F. J. Kiefer, T. F. Fässler and J. Eppinger, *J. Org. Chem.*, 2010, **695**, 2667–2672.
9. (a) J. Václavík, J. Přeč, M. Kuzma, P. Kačer and L. Červený, *Chem. Listy*, 2012, **106**, 206–210; (b) J. Václavík, J. Pecháček, B. Vilhanová, P. Šot, J. Januščák, V. Matoušek, J. Přeč, S. Bártoová, M. Kuzma and P. Kačer, *Catal. Lett.*, 2013, **143**, 555–562; (c) J. Václavík, P. Šot, B. Vilhanová, J. Pecháček, M. Kuzma and P. Kačer, *Molecules*, 2013, **18**, 6804–6828; (d) M. Kuzma, J. Václavík, P. Novák, J. Přeč, J. Januščák, J. Červený, J. Pecháček, P. Šot, B. Vilhanová, V. Matoušek, I. I. Goncharova, M. Urbanová and P. Kačer, *Dalton Trans.*, 2013, **42**, 5174–5182; (e) J. Přeč, V. Matoušek, J. Václavík, J. Pecháček, K. Syslová, P. Šot, J. Januščák, B. Vilhanová, M. Kuzma and P. Kačer, *Am. J. Anal. Chem.*, 2013, **4**, 125–133; (f) J. Přeč, J. Václavík, P. Šot, J. Pecháček, B. Vilhanová, J. Januščák, K. Syslová, R. Pažout, J. Maixner, J. Zápál, M. Kuzma and P. Kačer, *Catal. Commun.*, 2013, **36**, 67–70; (g) S. Watanuki, K. Matsuura, Y. Tomura, M. Okada, T. Okazaki, M. Ohta, S. Tsukamoto, *Chem. Pharm. Bull.* 2011, **59**, 1029–1037; (h) I. Ivanov, S. Nikolova, S. Statkova-Abeghe, *Heterocycles* 2005, **65**, 2483–2492; (i) Q.-R. Zhang, J.-R. Huang, W. Zhang, L. Dong, *Org. Lett.* 2014, **16**, 1684–1687.
10. J. Čubrilo, I. Hartenbach, T. Schleid and R. F. Winter, *Zeitschrift für Anorg. und Allg. Chemie*, 2006, **632**, 400–408.
11. H. D. Flack, *Acta Crystallogr., Sect. A: Found. Cryst.*, 1983, **39**, 876–881.

## 4. Copies of NMR spectra

## 4.1 4-(4-methylcyclohexa-1,4-dienyl)butan-1-ol (13a-c)

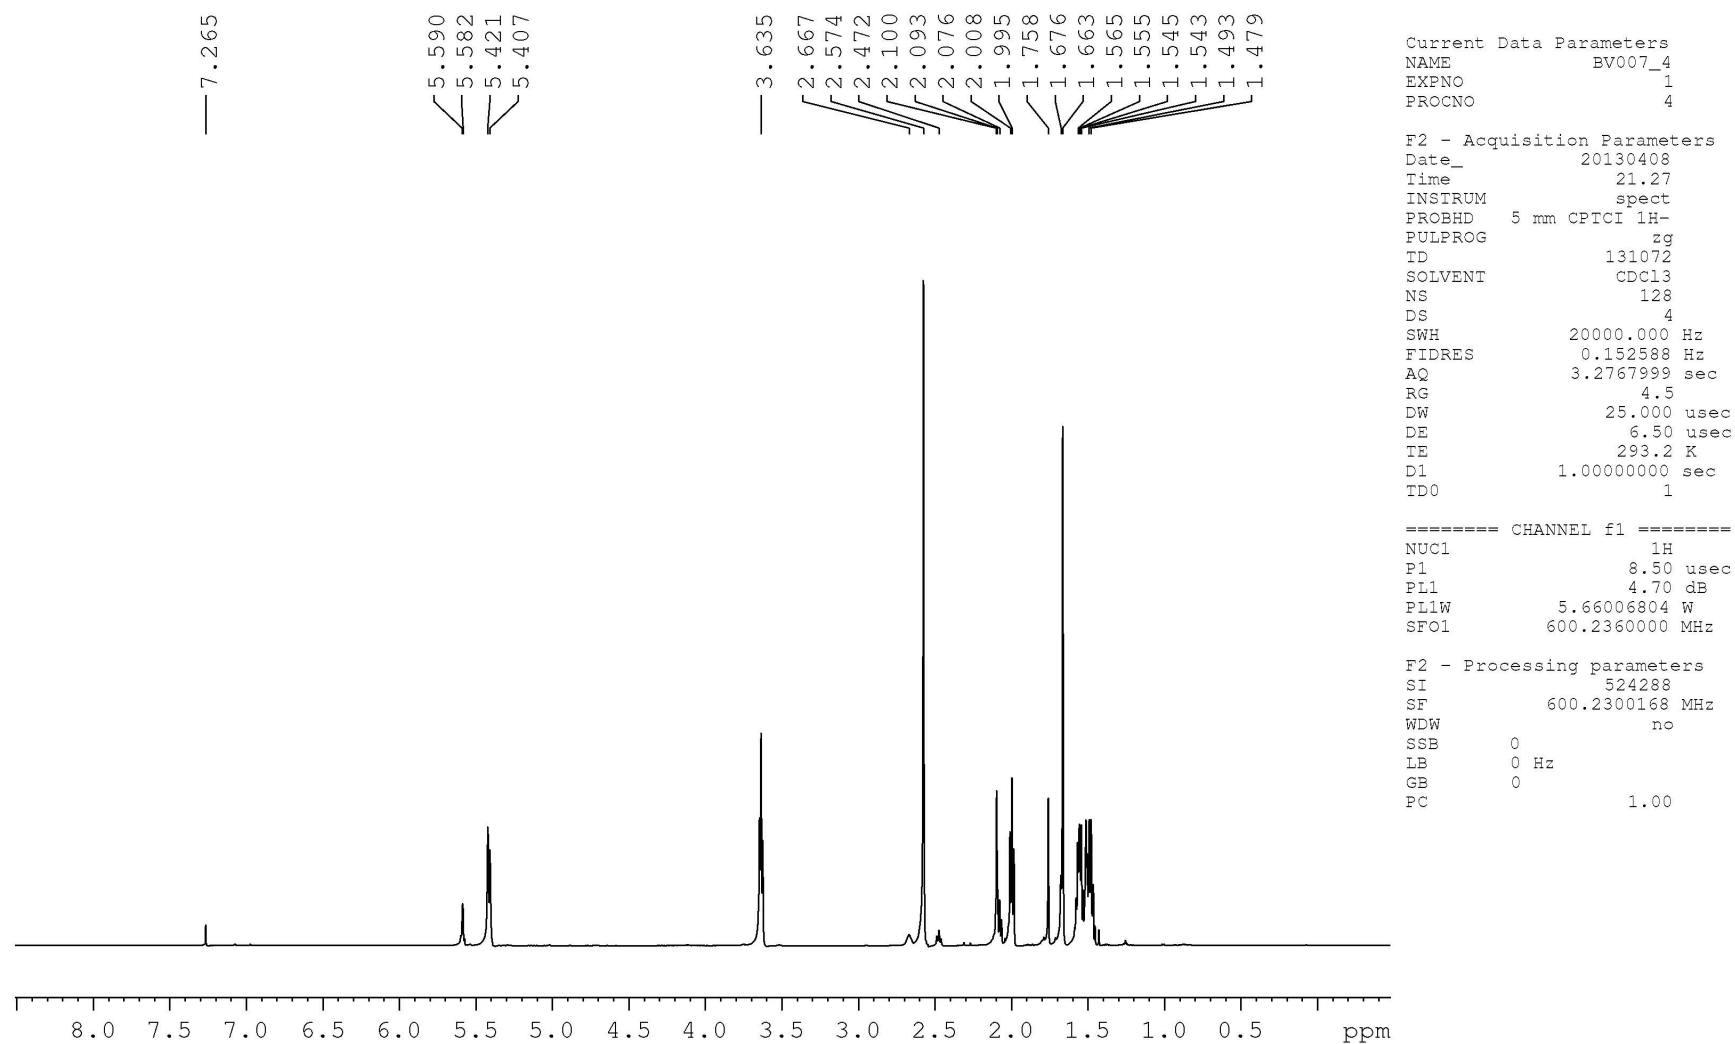



Electronic Supplementary Information

BV007\_4  
 solvent: CDC13  
 temp: 293,2 K  
 date: 8 Apr 2013

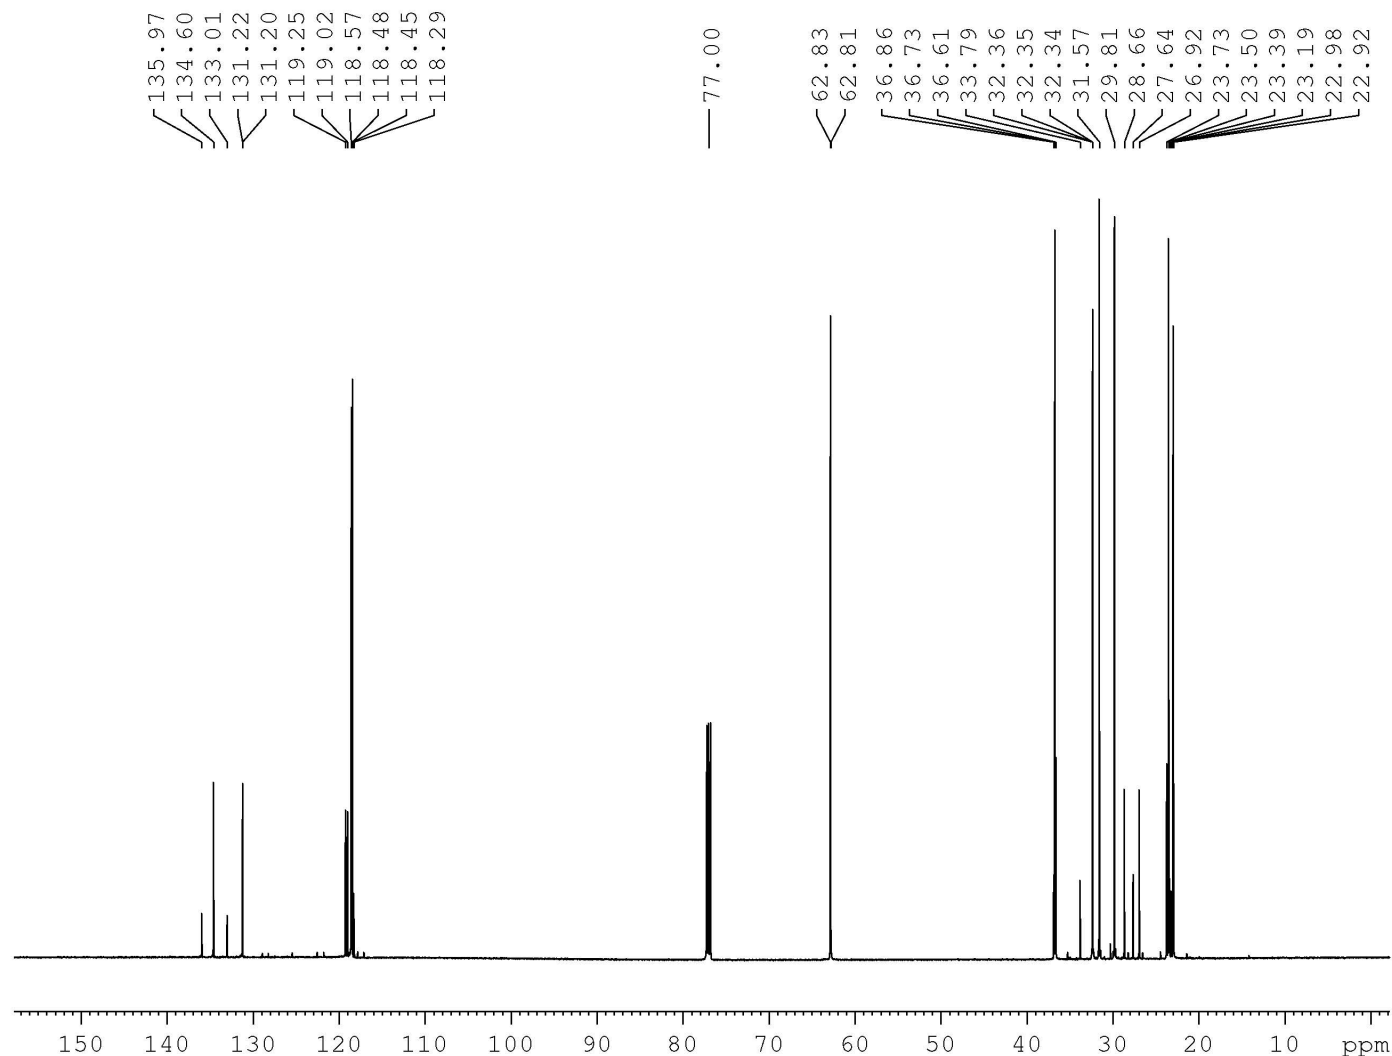

```

Current Data Parameters
NAME          BV007_4
EXPNO         2
PROCNO        1

F2 - Acquisition Parameters
Date_         20130408
Time          21.39
INSTRUM       spect
PROBHD        5 mm CPTCI 1H-
PULPROG       zgpg
TD            131072
SOLVENT       CDC13
NS            1024
DS            32
SWH           36057.691 Hz
FIDRES        0.275098 Hz
AQ            1.8175317 sec
RG            2050
DW            13.867 usec
DE            30.00 usec
TE            293.2 K
D1            1.00000000 sec
D11           0.03000000 sec
L31           1
TD0           1

===== CHANNEL f1 =====
NUC1           13C
P1             12.00 usec
PL1            0.30 dB
PL1W           107.13125610 W
SFO1           150.9430463 MHz

===== CHANNEL f2 =====
CPDPRG[2]     bi_waltz65_256
NUC2           1H
PCPD2         80.00 usec
PL2            4.70 dB
PL12           24.17 dB
PL13           24.70 dB
PL2W           5.66006804 W
PL12W          0.06394722 W
PL13W          0.05660067 W
SFO2           600.2324009 MHz

F2 - Processing parameters
SI            262144
SF            150.9279641 MHz
WDW           EM
SSB           0
LB            1.00 Hz
GB            0
PC            1.40
    
```

4.2  $[(\eta^6\text{-}(4\text{-}(p\text{-methylphenyl)butanol)RuCl}_2)_2$  (14a,b)

BV011-3  
 solvent: DMSO-d6  
 temp: 303,2 K  
 date: 29 MAR 2013

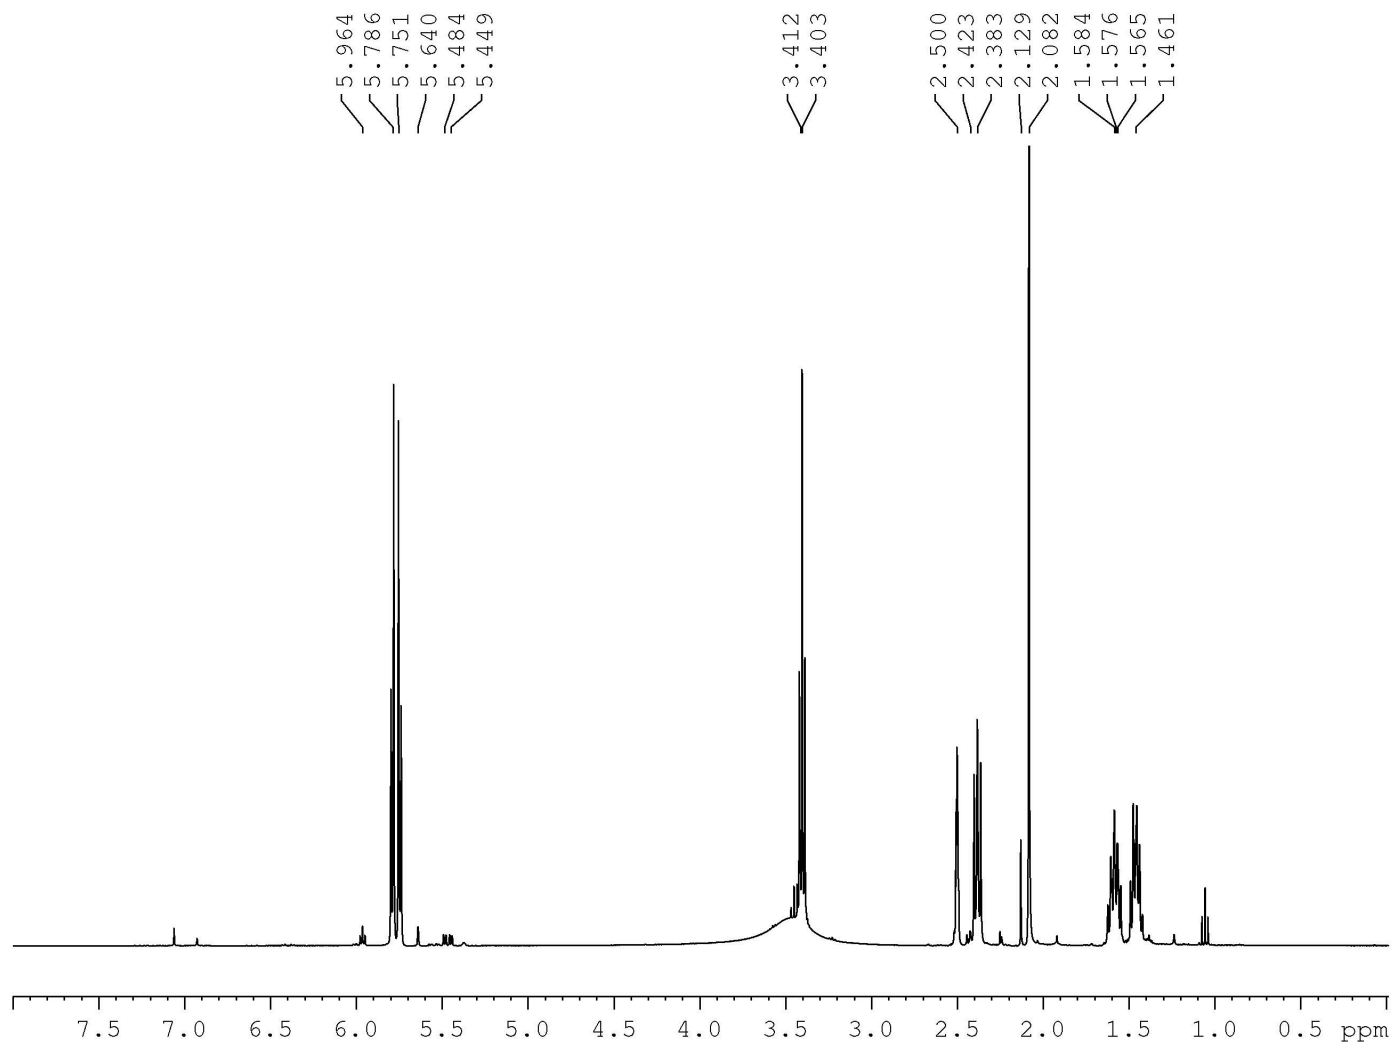

Current Data Parameters  
 NAME BV011-3  
 EXPNO 1  
 PROCNO 4

F2 - Acquisition Parameters  
 Date\_ 20130329  
 Time 10.11  
 INSTRUM spect  
 PROBHD 5 mm BBI 1H/D-  
 PULPROG zg  
 TD 65536  
 SOLVENT DMSO  
 NS 128  
 DS 4  
 SWH 8012.820 Hz  
 FIDRES 0.122266 Hz  
 AQ 4.0894465 sec  
 RG 812  
 DW 62.400 usec  
 DE 6.50 usec  
 TE 303.2 K  
 D1 1.00000000 sec  
 TD0 1

==== CHANNEL f1 =====  
 SFO1 400.0032000 MHz  
 NUC1 1H  
 P1 7.00 usec  
 PLW1 15.10200024 W

F2 - Processing parameters  
 SI 131072  
 SF 400.0000032 MHz  
 WDW EM  
 SSB 0  
 LB 0 Hz  
 GB 0  
 PC 1.00

Electronic Supplementary Information

BV011-3  
 solvent: DMSO-d6  
 temp: 303,2 K  
 date: 29 MAR 2013

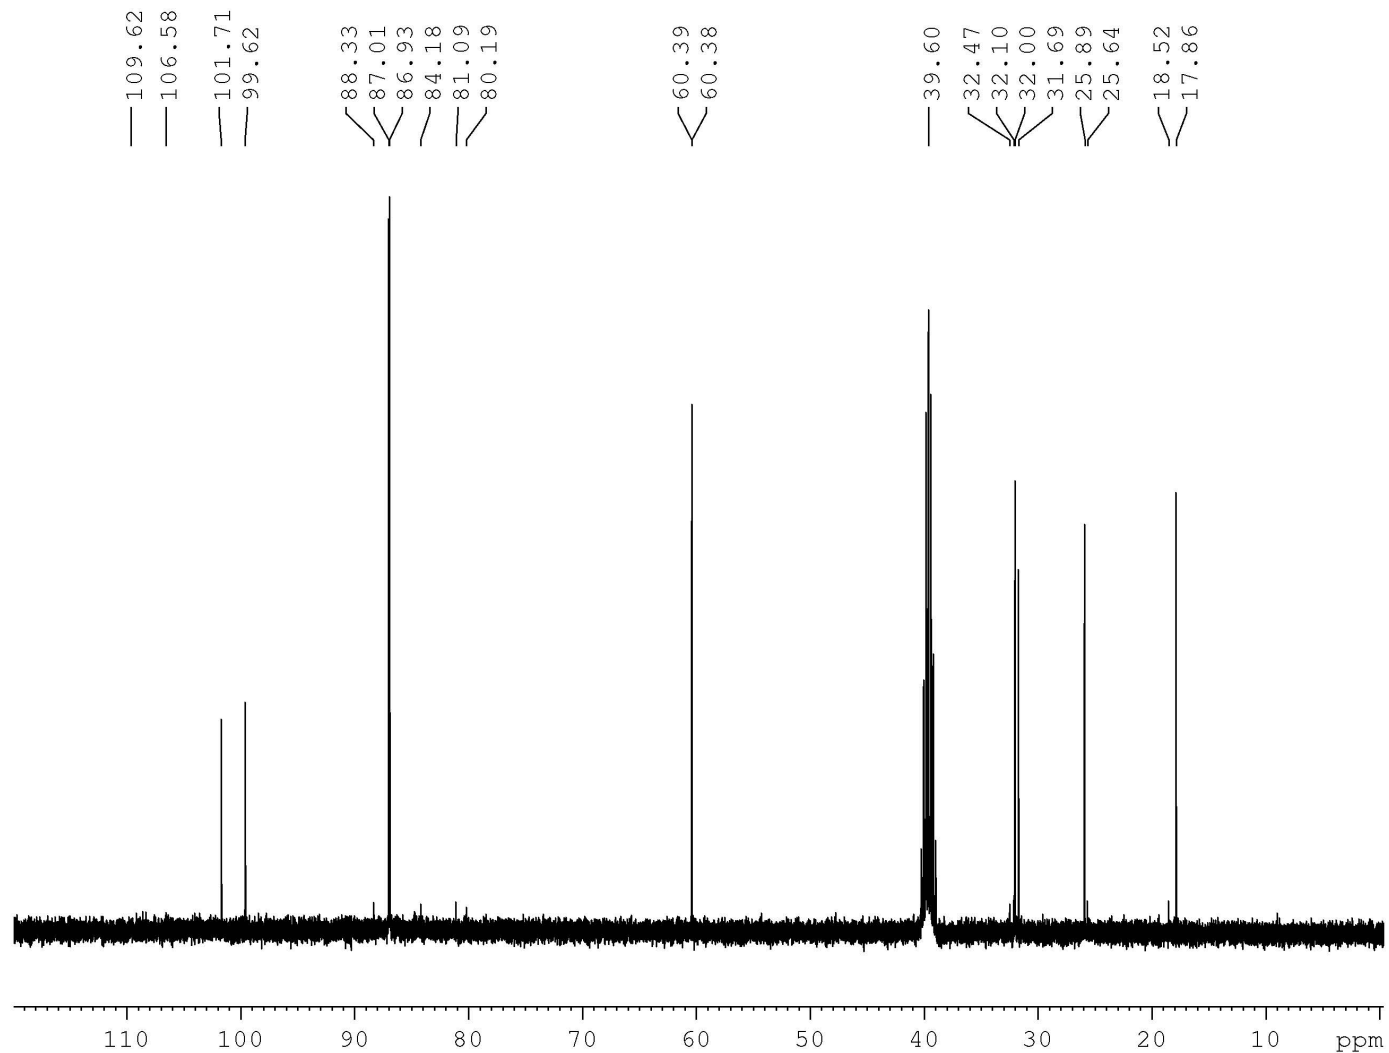

Current Data Parameters  
 NAME BV011-3  
 EXPNO 2  
 PROCNO 3

F2 - Acquisition Parameters  
 Date\_ 20130329  
 Time 10.56  
 INSTRUM spect  
 PROBHD 5 mm BBI 1H/D-  
 PULPROG zgpg  
 ID 65536  
 SOLVENT DMSO  
 NS 2304  
 DS 4  
 SWH 25252.525 Hz  
 FIDRES 0.385323 Hz  
 AQ 1.2976128 sec  
 RG 2050  
 DW 19.800 usec  
 DE 6.50 usec  
 TE 303.2 K  
 D1 1.00000000 sec  
 D11 0.03000000 sec  
 TDO 1

==== CHANNEL f1 =====  
 SFO1 100.5921496 MHz  
 NUC1 13C  
 P1 13.90 usec  
 PLW1 89.36699677 W

==== CHANNEL f2 =====  
 SFO2 400.0016000 MHz  
 NUC2 1H  
 CPDPRG[2 bi\_waltz65\_256  
 PCPD2 90.00 usec  
 PLW2 15.10200024 W  
 PLW12 0.09135900 W  
 PLW13 0.07400100 W

F2 - Processing parameters  
 SI 131072  
 SF 100.5801248 MHz  
 WDW EM  
 SSB 0  
 LB 0 Hz  
 GB 0  
 PC 1.40

4.3 [RuCl( $\eta^6$ -(*p*-methylphenyl)butanol)(*S,S*-TsDPEN)] (G)

BV023-1  
 solvent: DMSO-d6  
 temp: 303,2 K  
 date: 9 Apr 2013

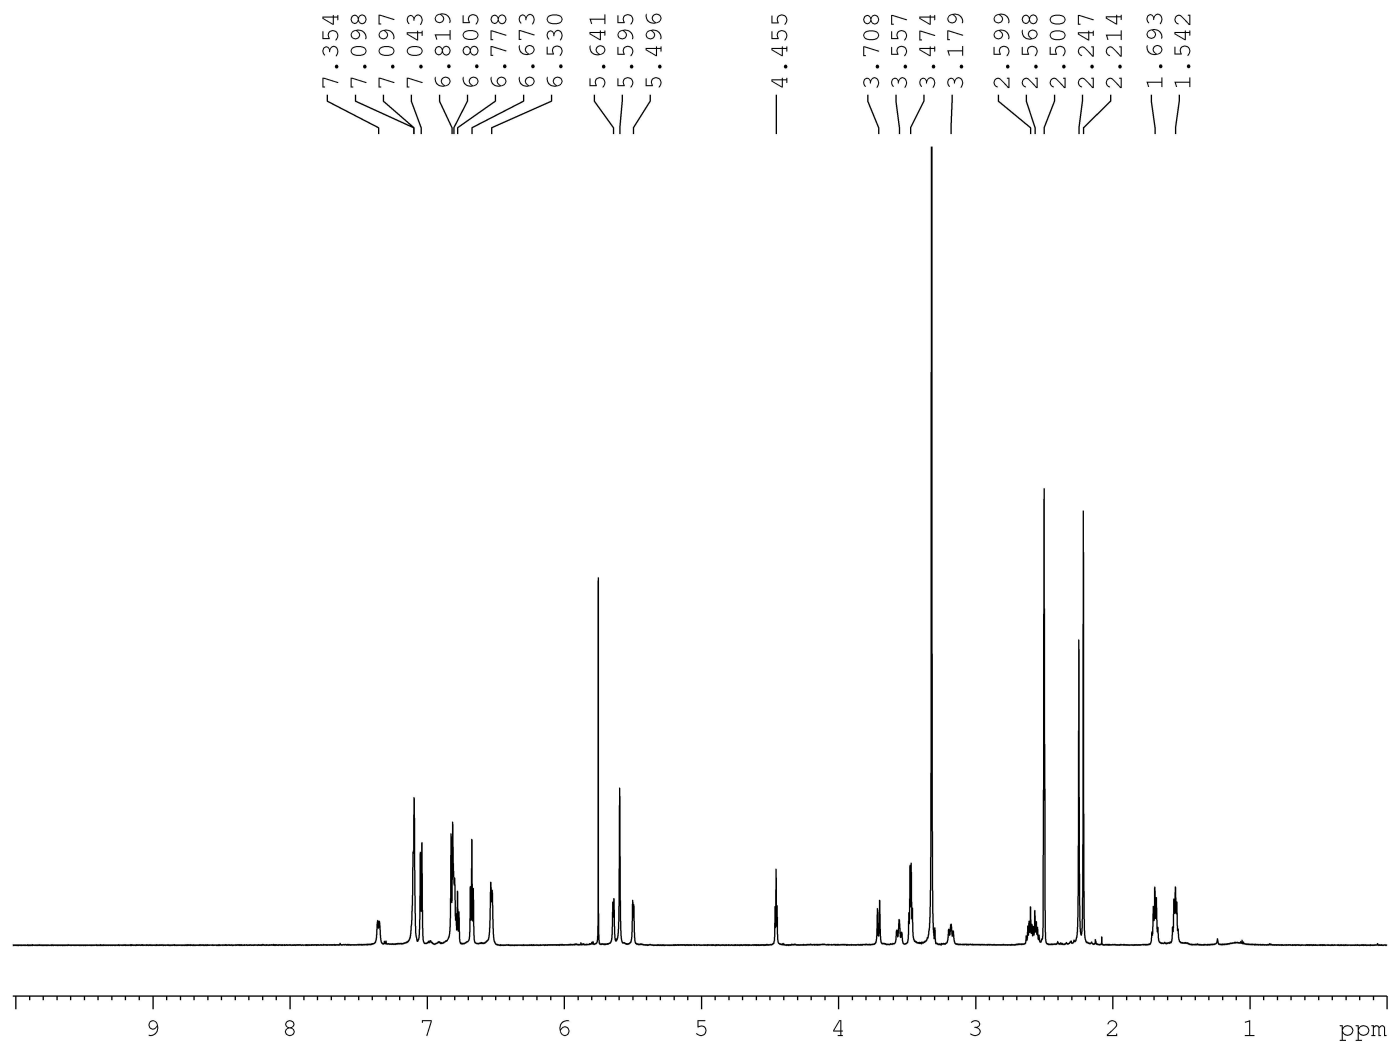

Current Data Parameters  
 NAME BV023-1  
 EXPNO 1  
 PROCNO 1

F2 - Acquisition Parameters  
 Date\_ 20130409  
 Time 14.04  
 INSTRUM spect  
 PROBHD 5 mm CPTCI 1H/  
 PULPROG zg30  
 TD 131072  
 SOLVENT DMSO  
 NS 128  
 DS 4  
 SWH 21008.404 Hz  
 FIDRES 0.160281 Hz  
 AQ 3.1195135 sec  
 RG 9  
 DW 23.800 usec  
 DE 21.00 usec  
 TE 303.1 K  
 D1 1.00000000 sec  
 TD0 1

==== CHANNEL f1 =====  
 SFO1 700.1370013 MHz  
 NUC1 1H  
 P1 7.10 usec  
 PLW1 12.00000000 W

F2 - Processing parameters  
 SI 262144  
 SF 700.1300095 MHz  
 WDW EM  
 SSB 0  
 LB 0 Hz  
 GB 0  
 PC 1.00

BV023-1  
 solvent: DMSO-d6  
 temp: 303,2 K  
 date: 9 Apr 2013

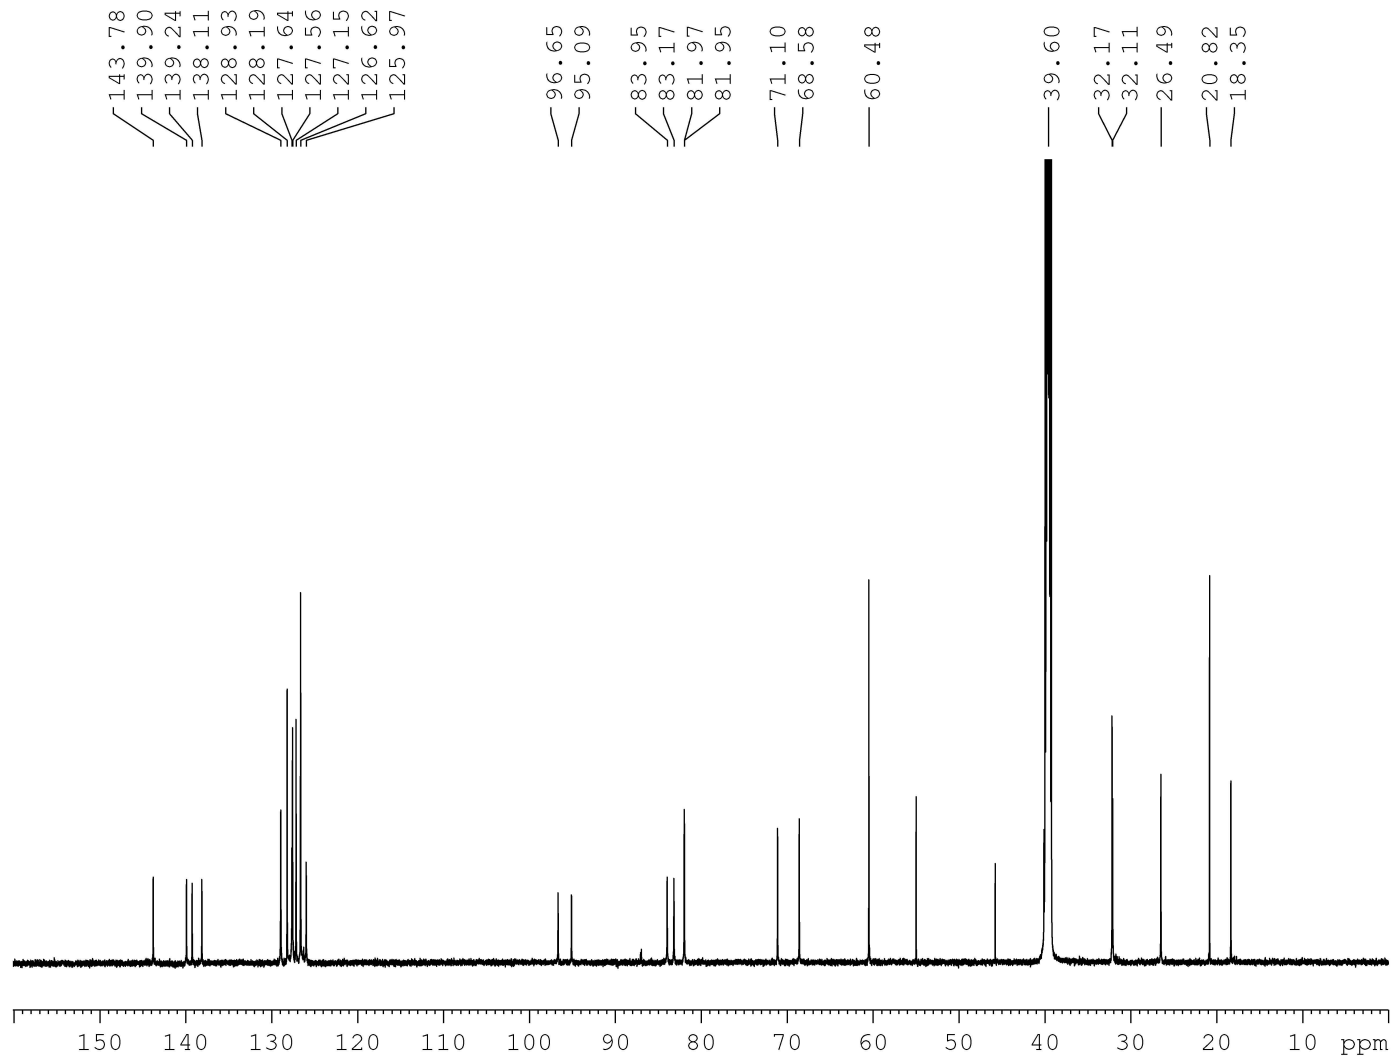

```

Current Data Parameters
NAME          BV023-1
EXPNO         2
PROCNO        2

F2 - Acquisition Parameters
Date_         20130409
Time          14.19
INSTRUM       spect
PROBHD        5 mm CPTCI 1H/
PULPROG       zgpg30
TD            130892
SOLVENT       DMSO
NS            4096
DS            32
SWH           41666.668 Hz
FIDRES        0.318329 Hz
AQ            1.5707040 sec
RG            2050
DW            12.000 usec
DE            18.00 usec
TE            303.3 K
D1            1.00000000 sec
D11           0.03000000 sec
TD0           1

===== CHANNEL f1 =====
SFO1          176.0654325 MHz
NUC1           13C
P1             12.50 usec
PLW1          -1.00000000 W

===== CHANNEL f2 =====
SFO2          700.1328005 MHz
NUC2            1H
CPDPRG[2]     mlev
PCPD2         65.00 usec
PLW2          -1.00000000 W
PLW12         -1.00000000 W
PLW13         -1.00000000 W

F2 - Processing parameters
SI            262144
SF            176.0479018 MHz
WDW           EM
SSB           0
LB            1.00 Hz
GB            0
PC            1.40
    
```

## 4.4 4-(4-methylcyclohexa-1,4-dienyl)butane (15a-c)

BV-D4  
 solvent: CDCl<sub>3</sub>  
 temp: 293.2 K  
 date : 22 Aug 2014

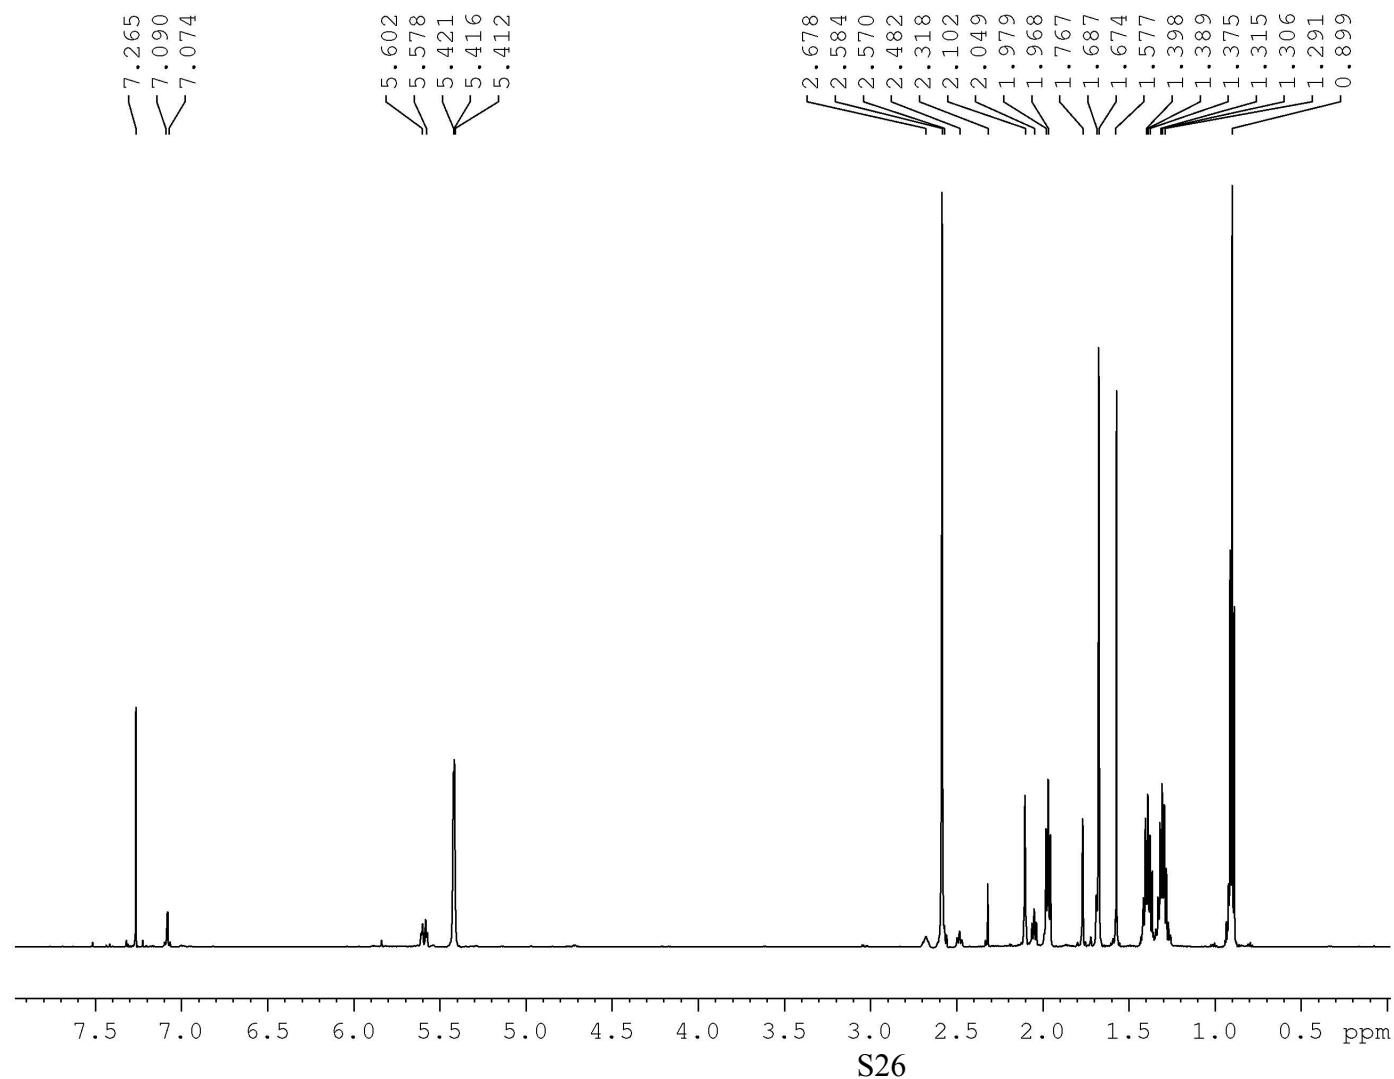

BV-D4  
 solvent: DMSO  
 temp: 303.2 K  
 date : 22 Aug 2014

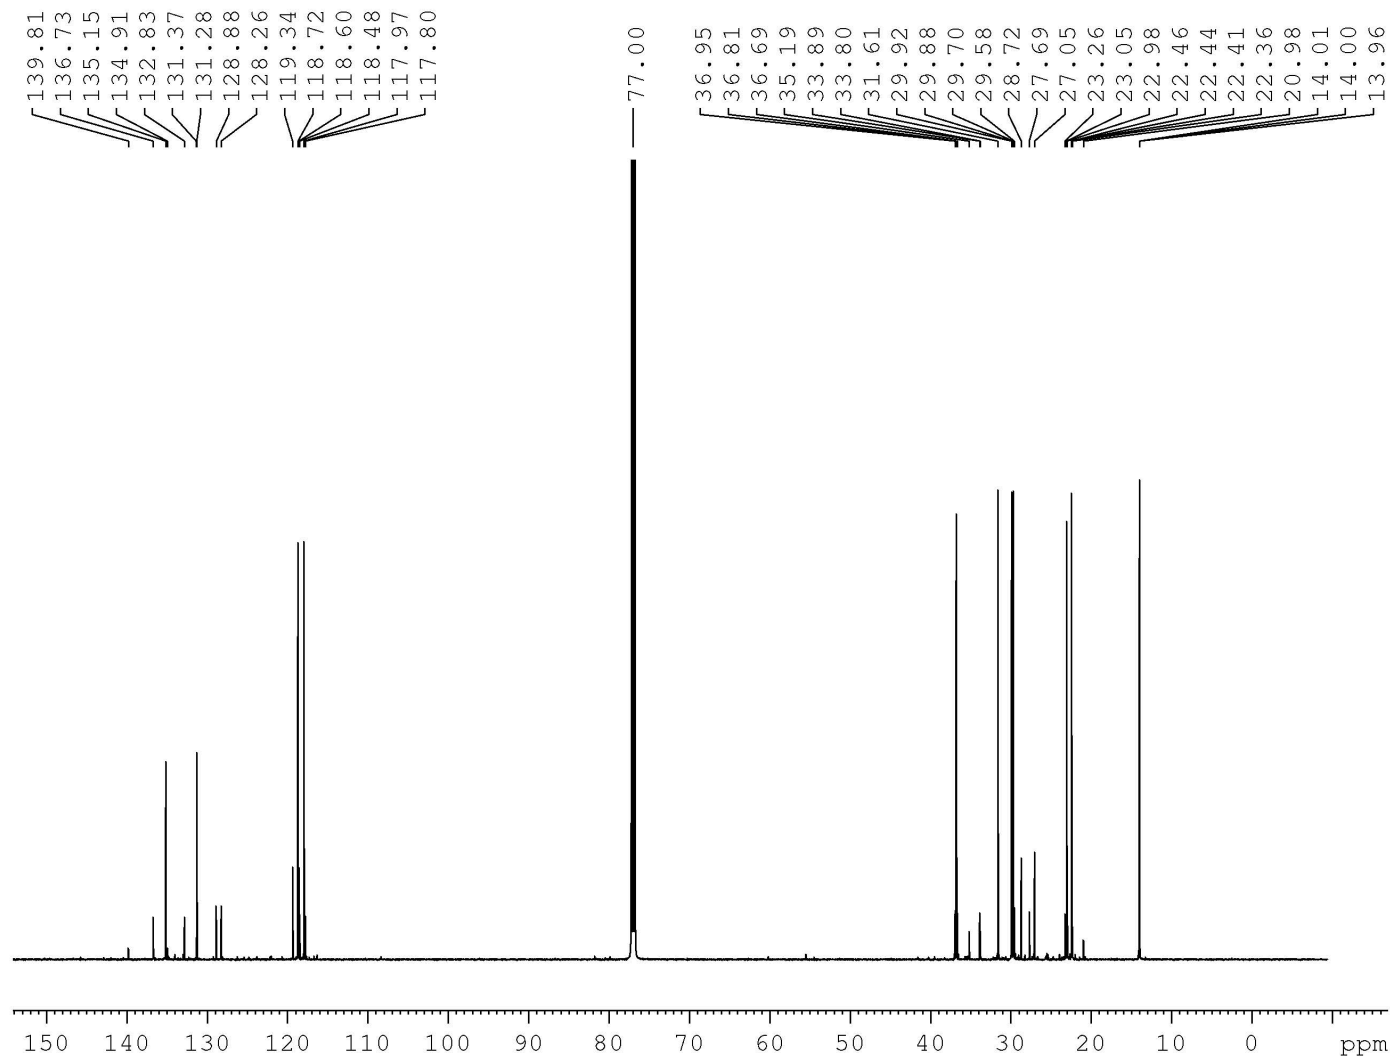

```

Current Data Parameters
NAME          BV-D4
EXPNO         2
PROCNO        2

F2 - Acquisition Parameters
Date_         20140822
Time          7.42
INSTRUM       spect
PROBHD        5 mm CPTCI 1H-
PULPROG       zgpg30
ID            130892
SOLVENT       CDCl3
NS            8192
DS            64
SWH           39062.500 Hz
FIDRES        0.298433 Hz
AQ            1.6754175 sec
RG            203
DW            12.800 usec
DE            30.00 usec
TE            293.1 K
D1            1.00000000 sec
D11           0.03000000 sec
TD0           1

===== CHANNEL f1 =====
SFO1          150.9460654 MHz
NUC1           13C
P1            12.00 usec
PLW1          107.12999725 W

===== CHANNEL f2 =====
SFO2          600.2324009 MHz
NUC2           1H
CPDPRG[2]    bi_waltz65_256
PCPD2         70.00 usec
PLW2          5.66009998 W
PLW12         0.08345700 W
PLW13         0.04089400 W

F2 - Processing parameters
SI            262144
SF            150.9279594 MHz
WDW           EM
SSB           0
LB            1.00 Hz
GB            0
PC            1.40
    
```





BV-037-1  
 solvent: DMSO  
 temp: 303.2 K  
 date : 24 Jul 2014

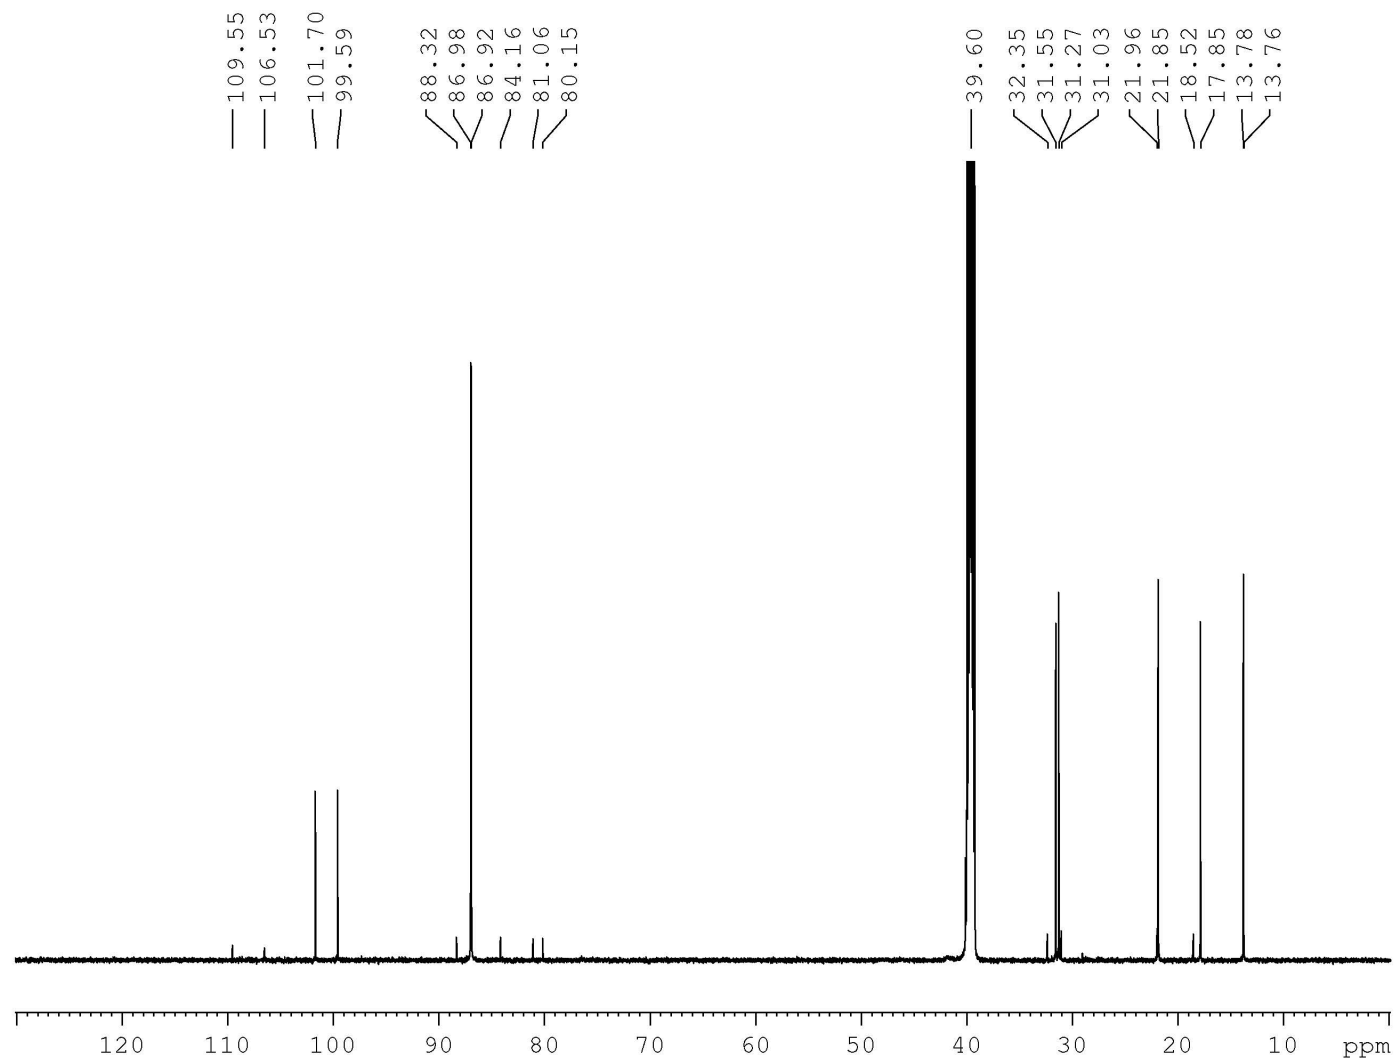

Current Data Parameters  
 NAME BV037-1  
 EXPNO 2  
 PROCNO 4

F2 - Acquisition Parameters  
 Date\_ 20140724  
 Time 22.33  
 INSTRUM spect  
 PROBHD 5 mm CPTCI 1H/  
 PULPROG zgpg30  
 TD 130892  
 SOLVENT DMSO  
 NS 2048  
 DS 64  
 SWH 45454.547 Hz  
 FIDRES 0.347268 Hz  
 AQ 1.4398119 sec  
 RG 2050  
 DW 11.000 usec  
 DE 30.00 usec  
 TE 303.2 K  
 D1 1.00000000 sec  
 D11 0.03000000 sec  
 TD0 1

==== CHANNEL f1 =====  
 SFO1 176.0689543 MHz  
 NUC1 13C  
 P1 12.50 usec  
 PLW1 130.00000000 W

==== CHANNEL f2 =====  
 SFO2 700.1328005 MHz  
 NUC2 1H  
 CPDPRG[2 bi\_waltz65\_256  
 PCPD2 65.00 usec  
 PLW2 12.00000000 W  
 PLW12 0.14318000 W  
 PLW13 0.06049200 W

F2 - Processing parameters  
 SI 262144  
 SF 176.0479064 MHz  
 WDW EM  
 SSB 0  
 LB 1.00 Hz  
 GB 0  
 PC 1.40

4.6 [RuCl( $\eta^6$ -(*p*-methylphenyl)butane)(*S,S*-TsDPEN)] (H)

BV038-1a  
 solvent: DMSO  
 temp: 303.2 K  
 date : 20 Aug 2014

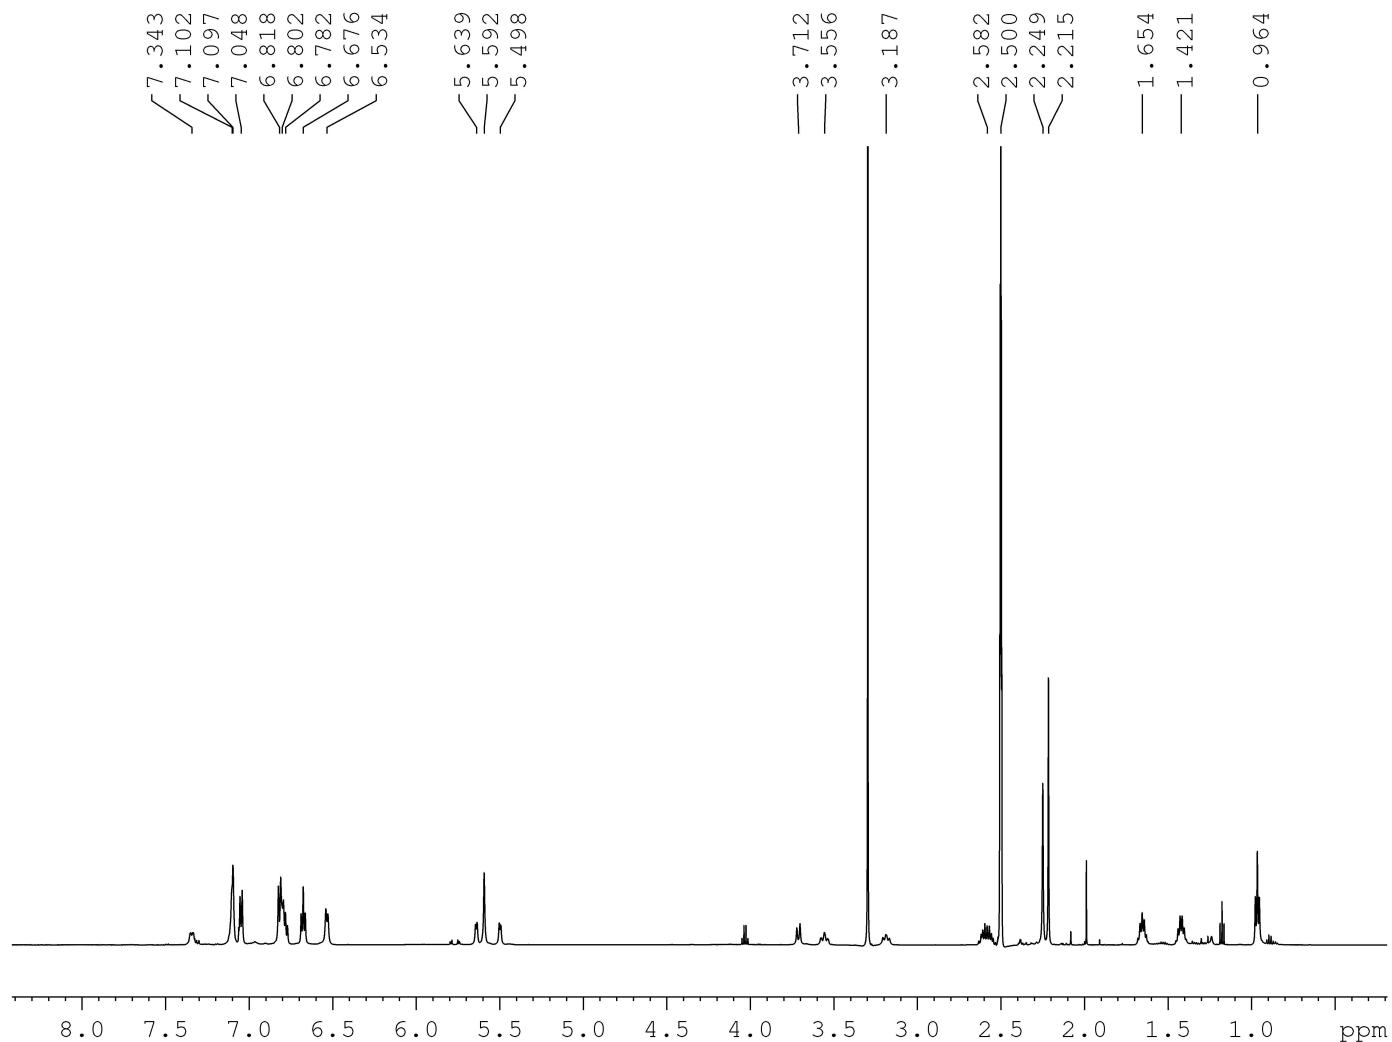

Current Data Parameters  
 NAME BV038-1a  
 EXPNO 1  
 PROCNO 2

F2 - Acquisition Parameters  
 Date\_ 20140820  
 Time 14.27  
 INSTRUM spect  
 PROBHD 5 mm CPTCI 1H-  
 PULPROG zg  
 TD 131072  
 SOLVENT DMSO  
 NS 32  
 DS 4  
 SWH 18028.846 Hz  
 FIDRES 0.137549 Hz  
 AQ 3.6350634 sec  
 RG 9  
 DW 27.733 usec  
 DE 11.49 usec  
 TE 303.2 K  
 D1 60.0000000 sec  
 TD0 1

===== CHANNEL f1 =====  
 SFO1 600.2360023 MHz  
 NUC1 1H  
 P1 8.50 usec  
 PLW1 5.66009998 W

F2 - Processing parameters  
 SI 262144  
 SF 600.2300041 MHz  
 WDW EM  
 SSB 0  
 LB 0.20 Hz  
 GB 0  
 PC 1.00

BV038-1a  
 solvent: DMSO  
 temp: 303.2 K  
 date : 20 Aug 2014

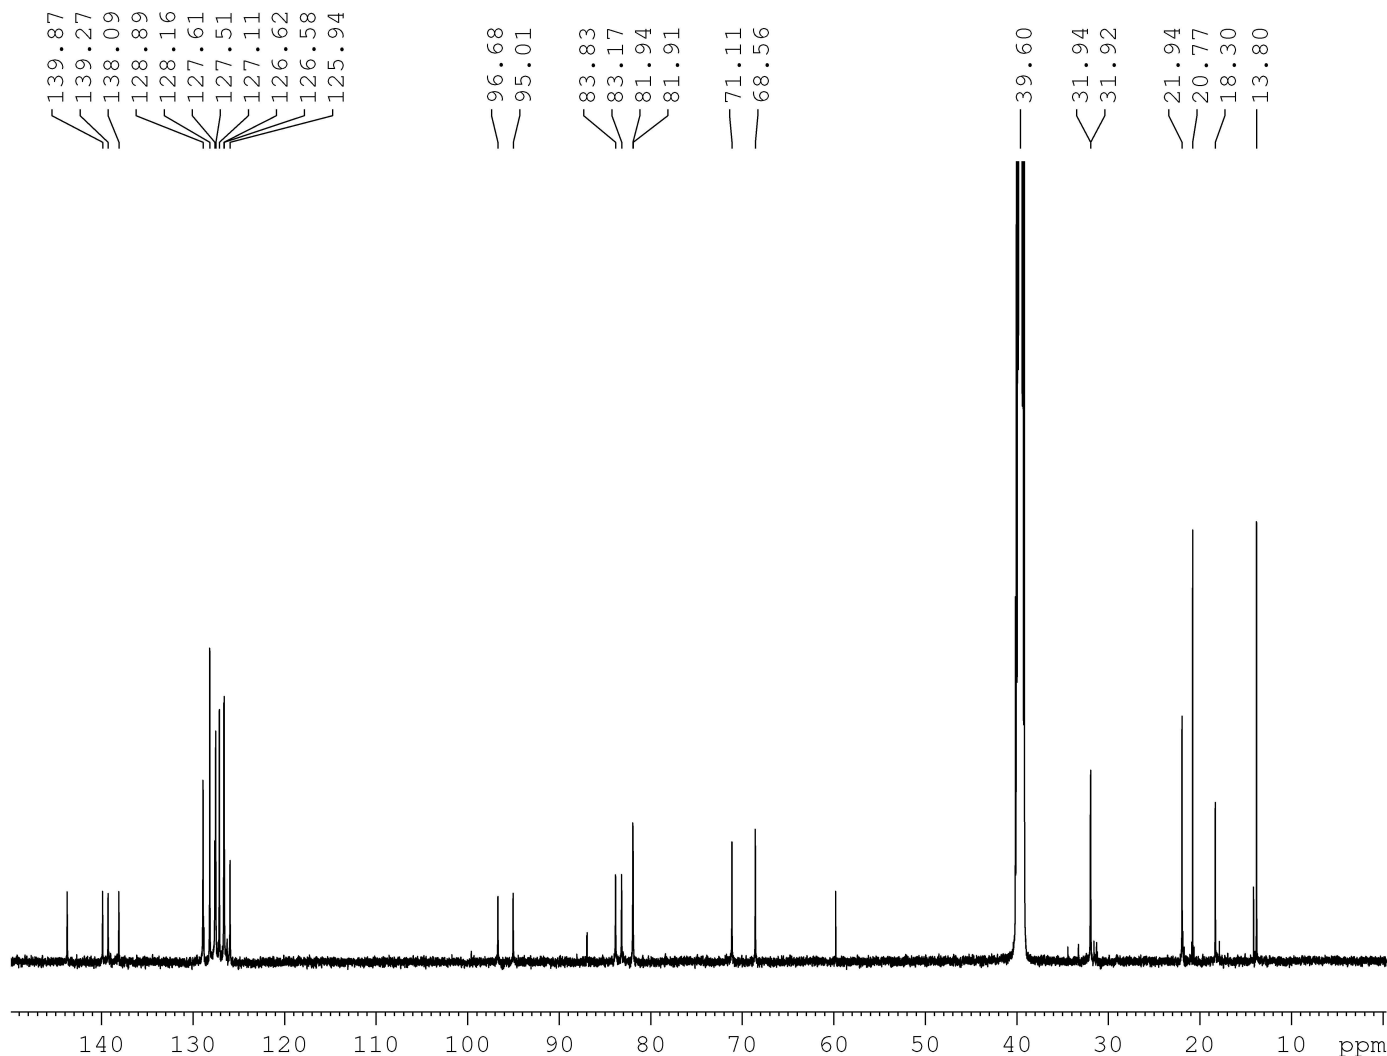

Current Data Parameters  
 NAME BV038-1a  
 EXPNO 2  
 PROCNO 2

F2 - Acquisition Parameters  
 Date\_ 20140820  
 Time 15.25  
 INSTRUM spect  
 PROBHD 5 mm CPTCI 1H-  
 PULPROG zgpg30  
 TD 130892  
 SOLVENT DMSO  
 NS 8192  
 DS 64  
 SWH 39062.500 Hz  
 FIDRES 0.298433 Hz  
 AQ 1.6754175 sec  
 RG 1620  
 DW 12.800 usec  
 DE 18.00 usec  
 TE 303.2 K  
 D1 1.00000000 sec  
 D11 0.03000000 sec  
 TD0 1

==== CHANNEL f1 =====  
 SFO1 150.9460654 MHz  
 NUC1 13C  
 P1 12.00 usec  
 PLW1 107.12999725 W

==== CHANNEL f2 =====  
 SFO2 600.2324009 MHz  
 NUC2 1H  
 CPDPRG[2] bi\_waltz65\_256  
 PCPD2 70.00 usec  
 PLW2 5.66009998 W  
 PLW12 0.08345700 W  
 PLW13 0.04089400 W

F2 - Processing parameters  
 SI 262144  
 SF 150.9280202 MHz  
 WDW EM  
 SSB 0  
 LB 1.00 Hz  
 GB 0  
 PC 1.40
